# Supplementary material for: Comparing Preventable Hospitalizations Among Veterans With and Without Mental Illnesses Before and After Implementation of PACT
Source: Atypon-hosted journal article supplement (doi:10.1176/appi.ps.201700316), 2018-10-10

**Appendix 1. Diagram of clinic-level longitudinal data construction using a fictional clinic 1 (46 quarters from Oct. 2003 - Mar. 2015)**

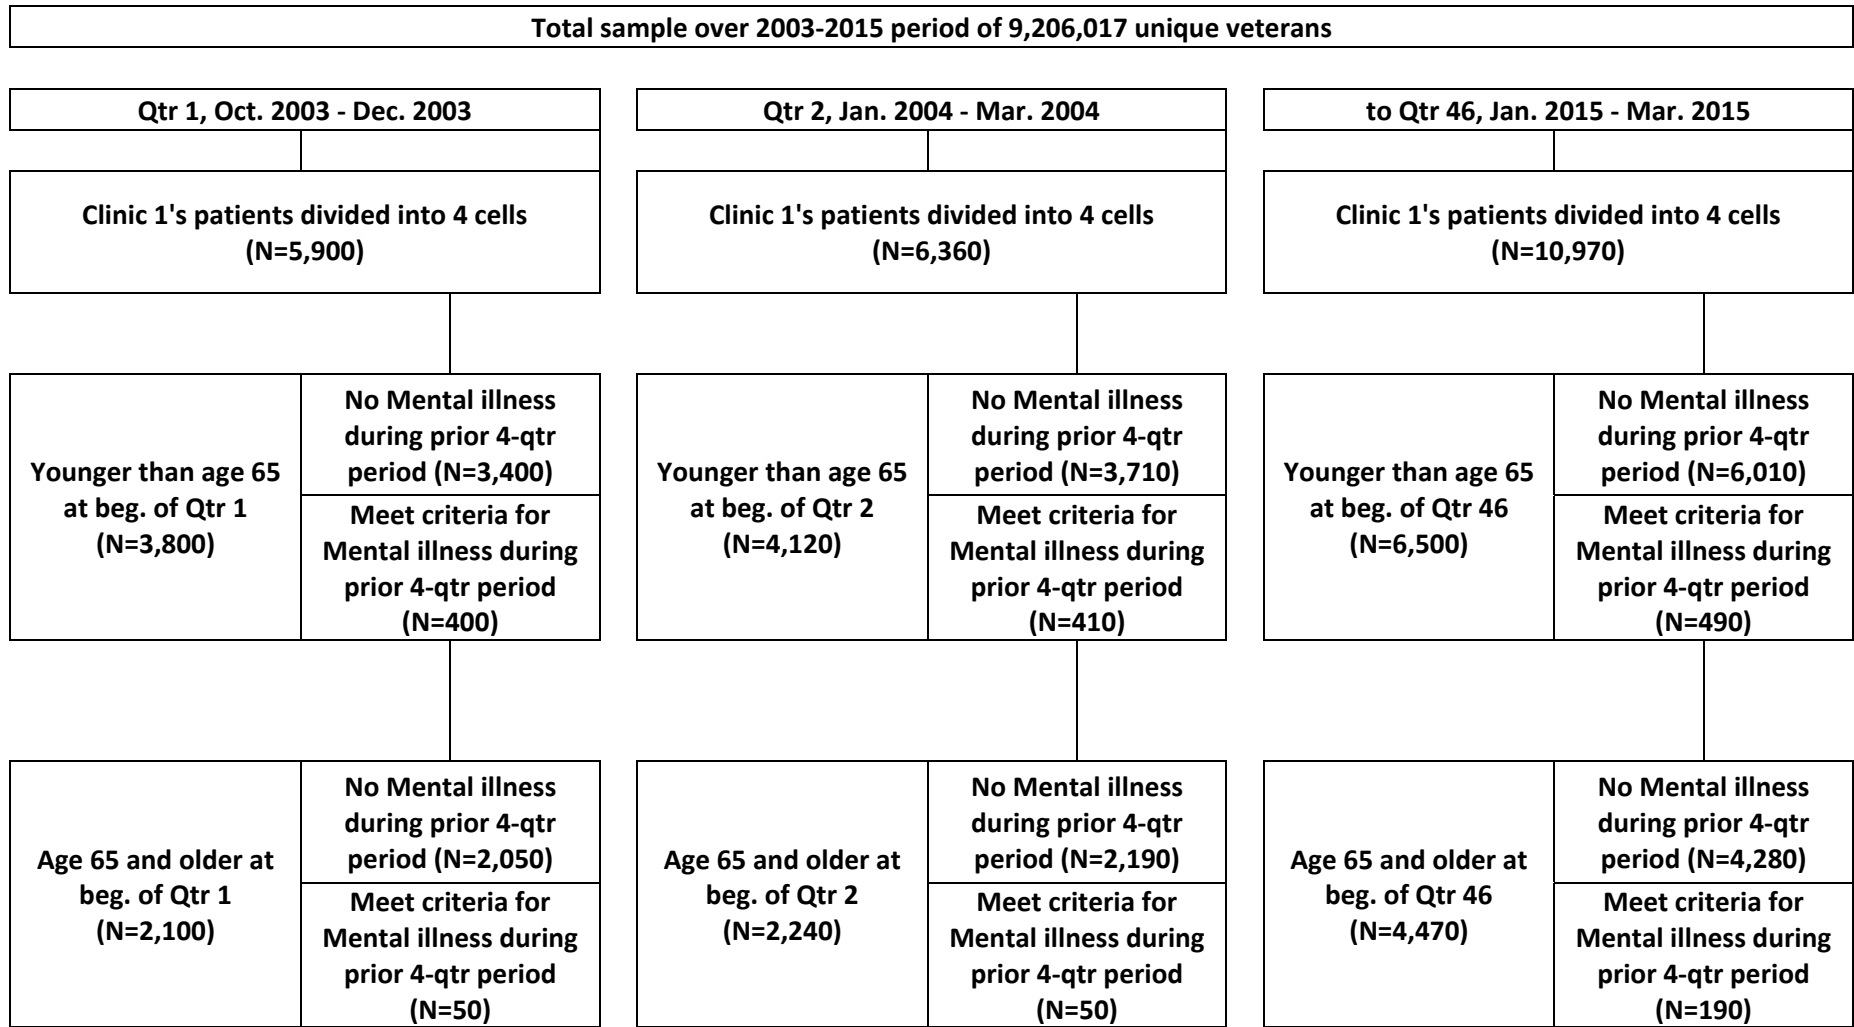

**Under 65, Any Psychiatric Dx, No PACT**

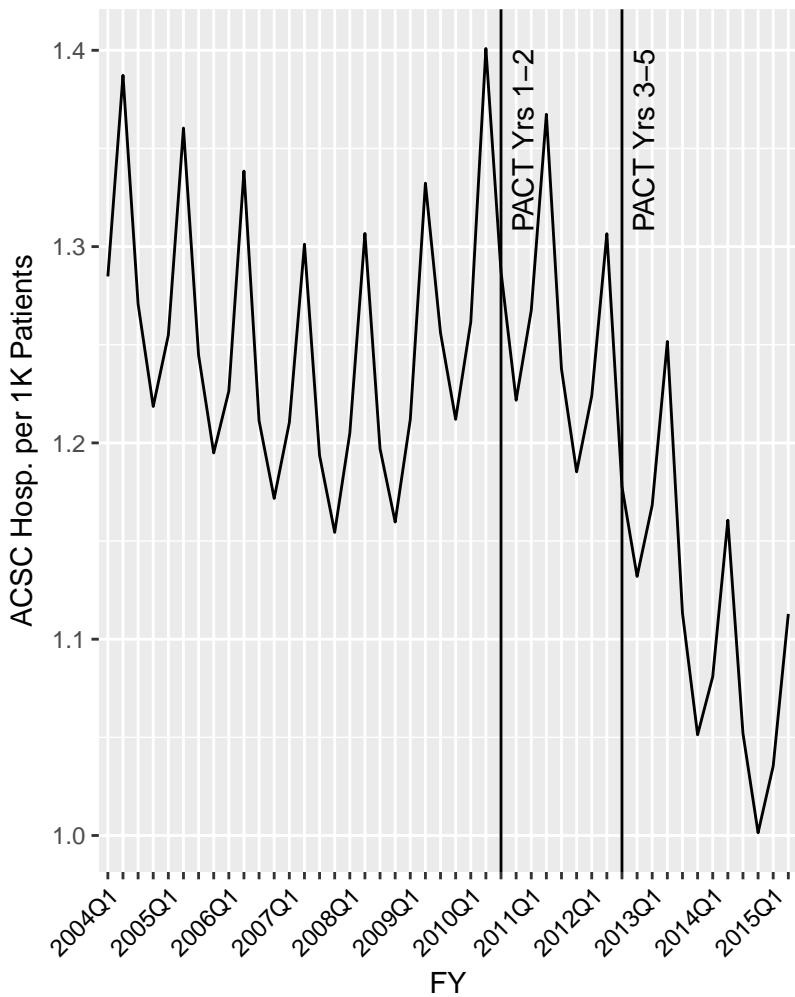

**Under 65, Any Psychiatric Dx, No PACT**

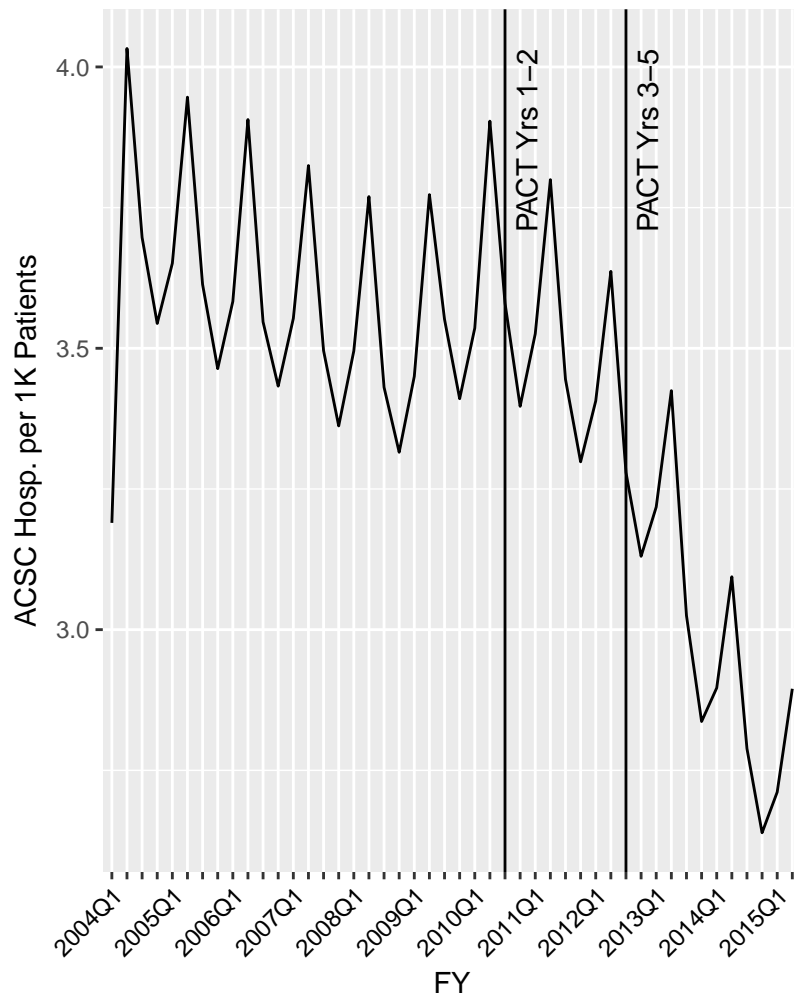

**Under 65, Any Psychiatric Dx, With PACT**

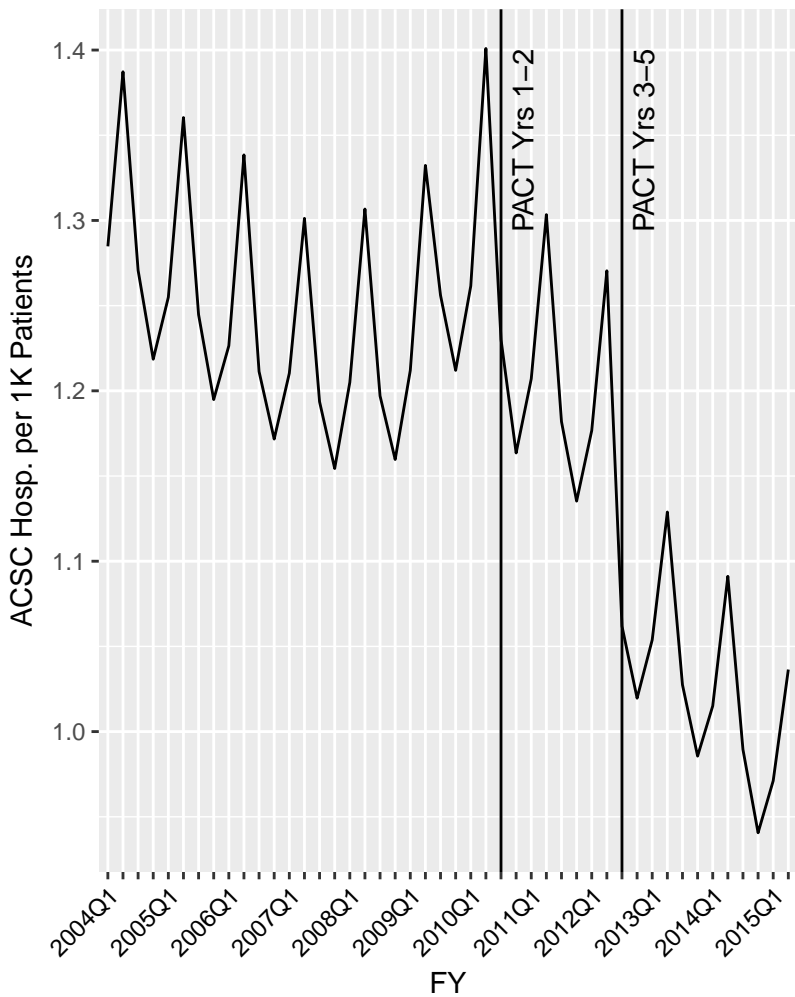

**Under 65, Any Psychiatric Dx, With PACT**

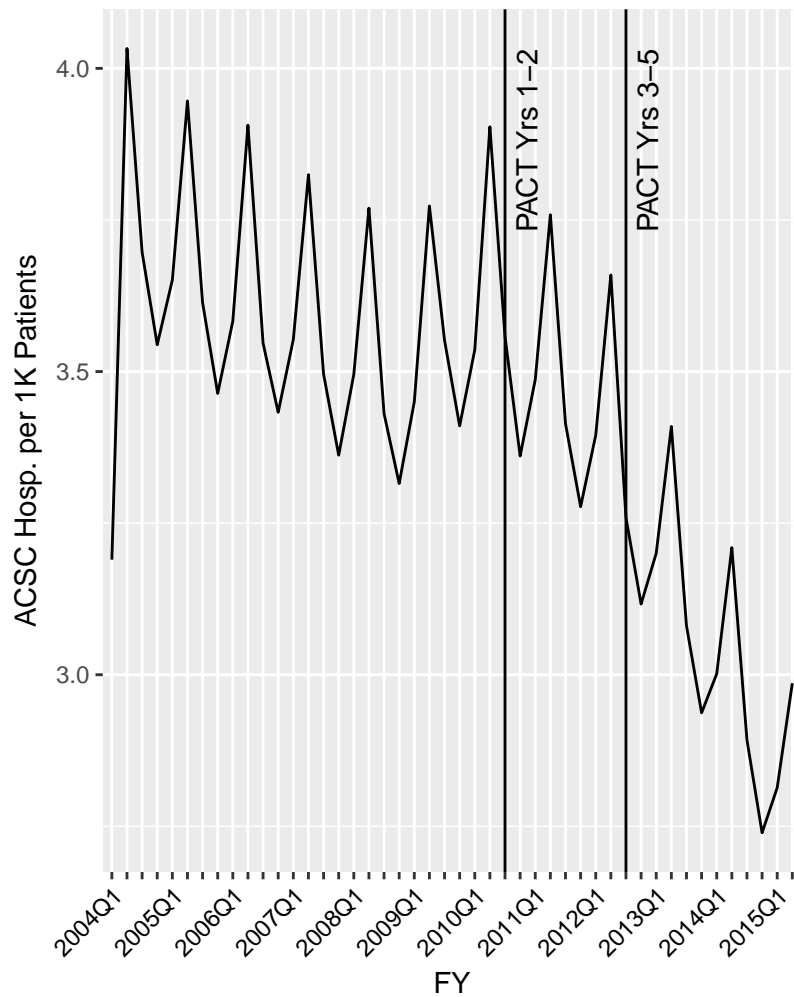

**Over 65, Any Psychiatric Dx, No PACT**

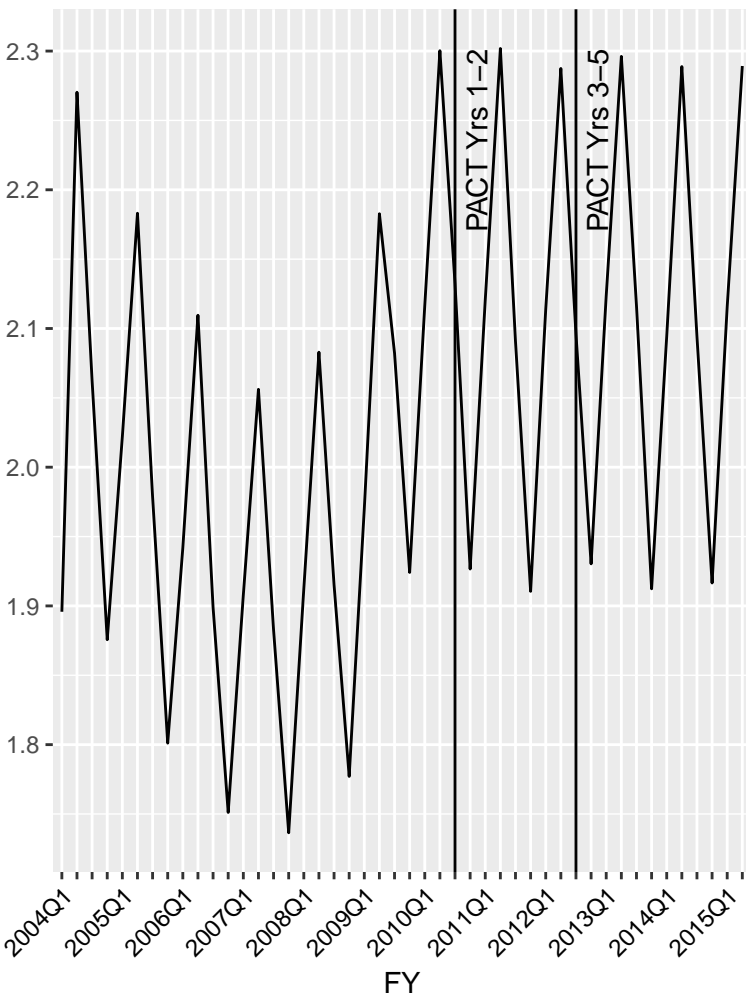

**Over 65, Any Psychiatric Dx, No PACT**

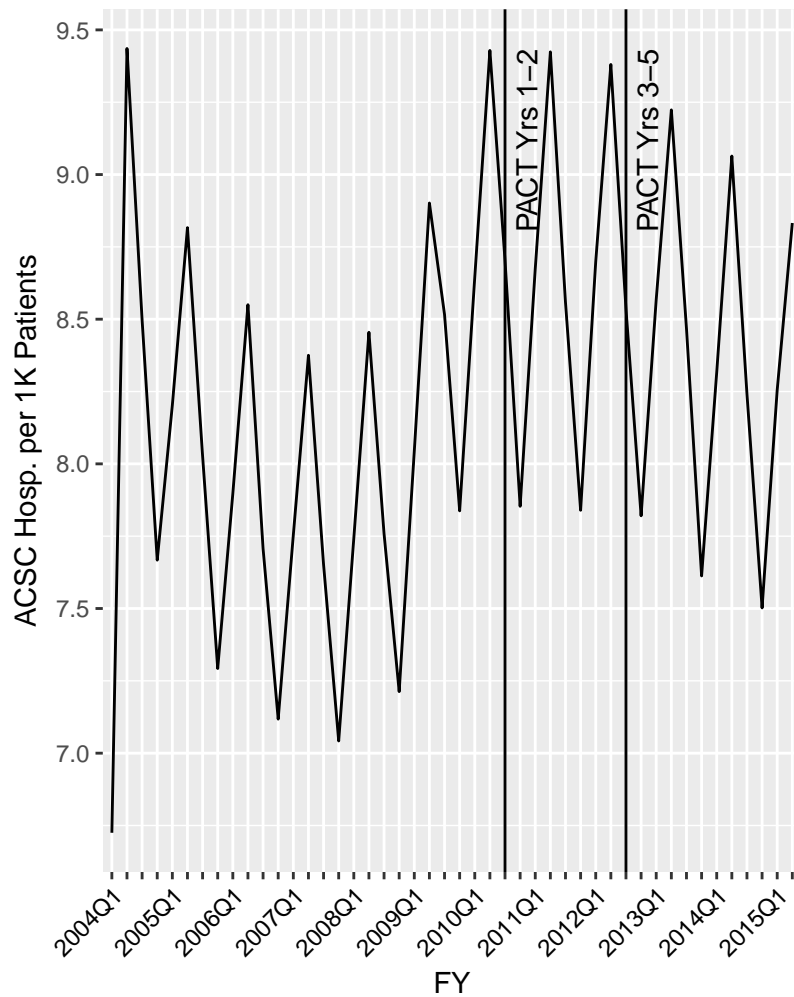

**Over 65, No MENTAL Dx, With PACT**

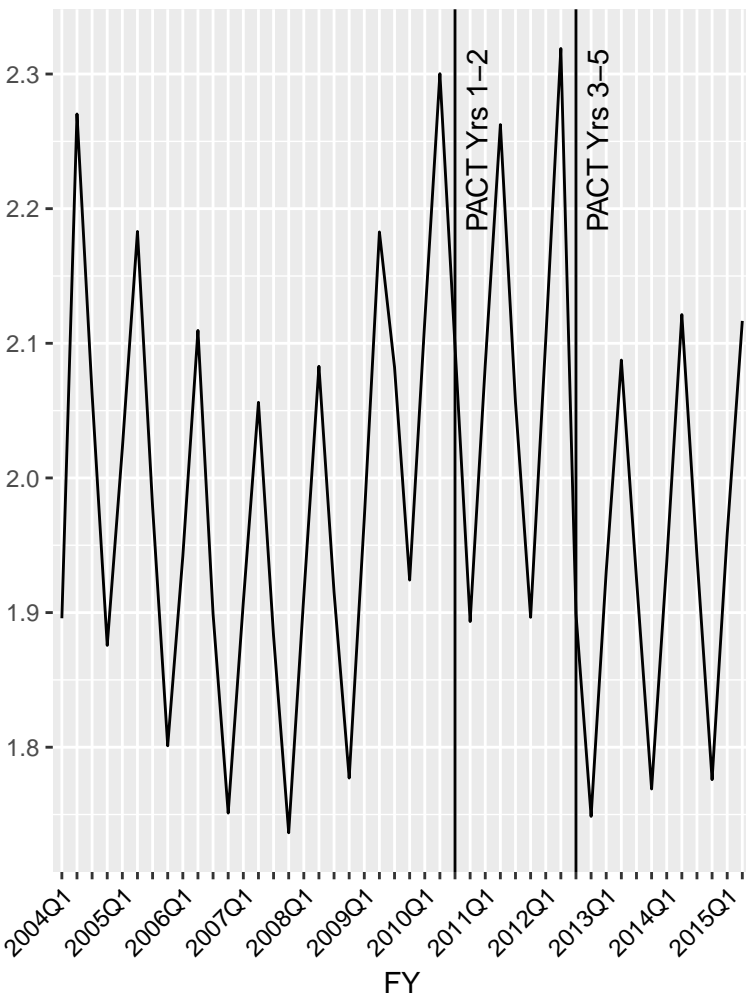

**Over 65, Any Psychiatric Dx, With PACT**

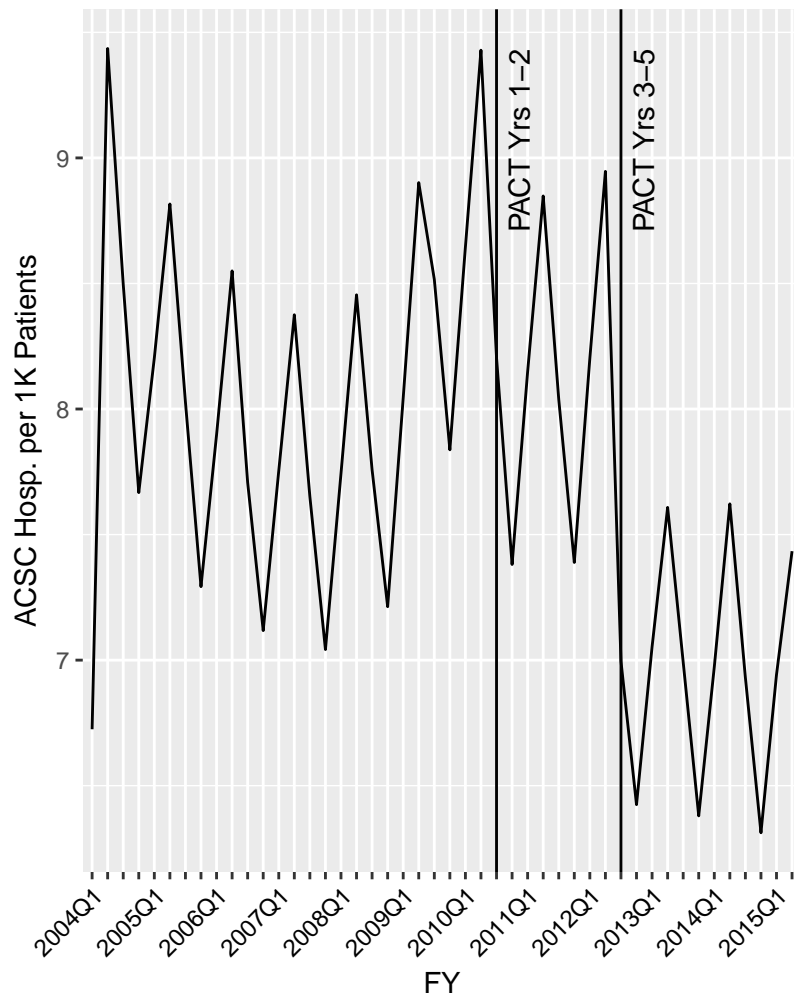

**Under 65, No Anxiety Dx, No PACT**

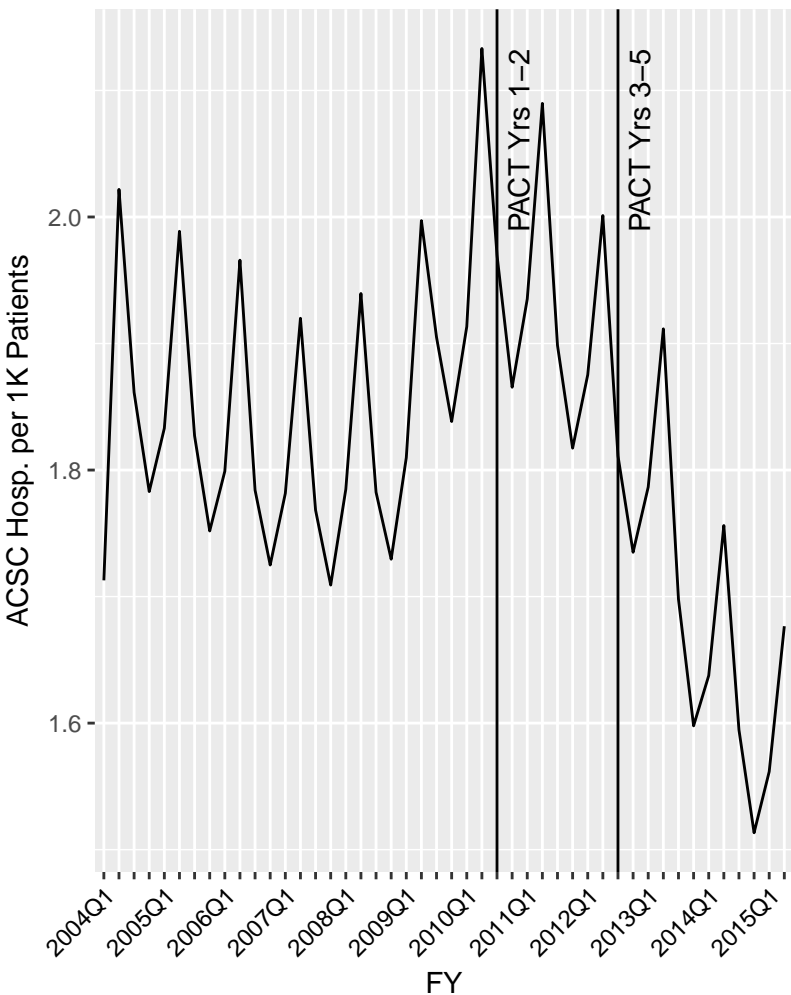

**Under 65, Anxiety Dx, No PACT**

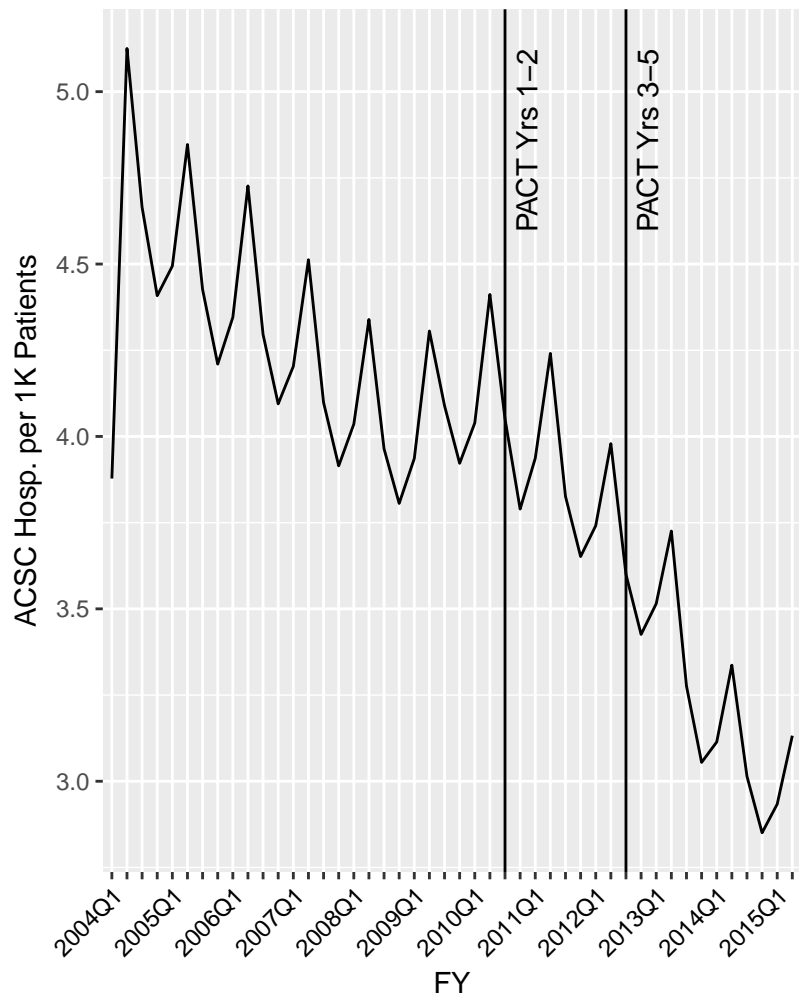

**Under 65, No Anxiety Dx, With PACT**

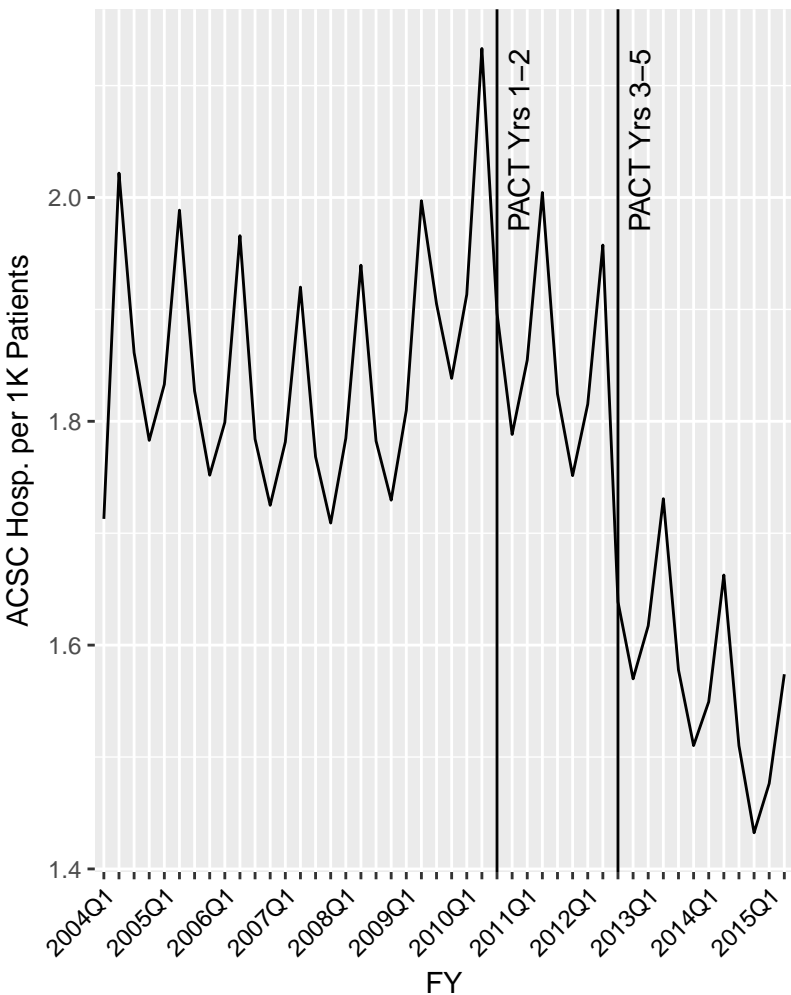

**Under 65, Anxiety Dx, With PACT**

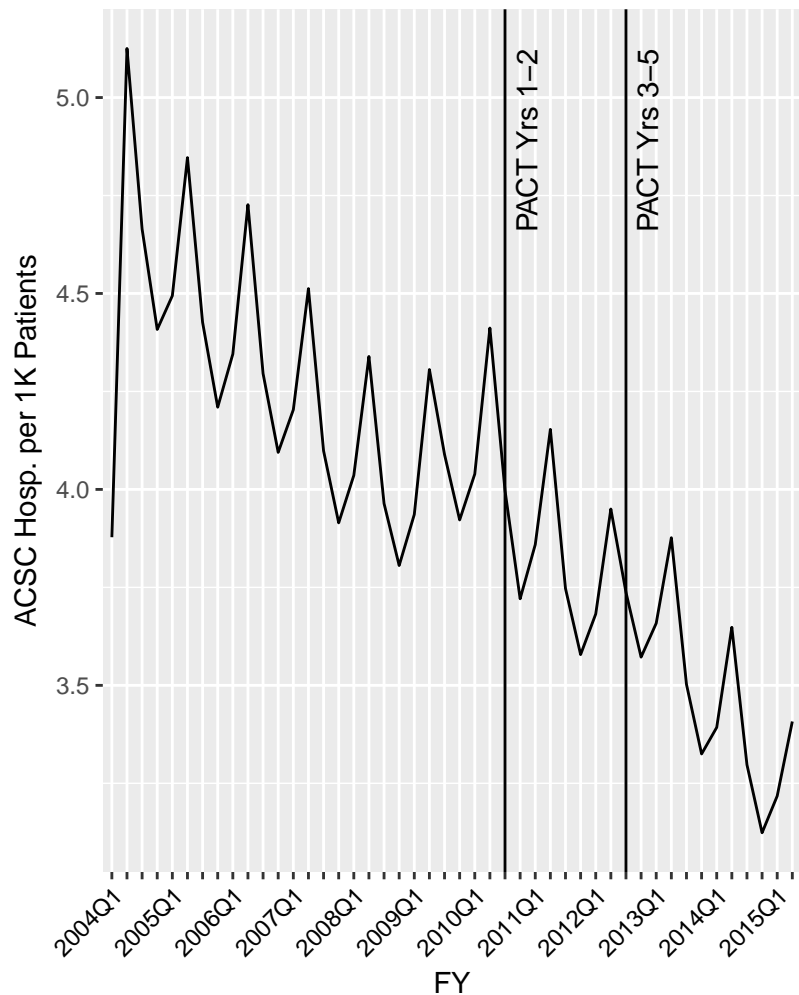

Over 65, No Anxiety Dx, No PACT

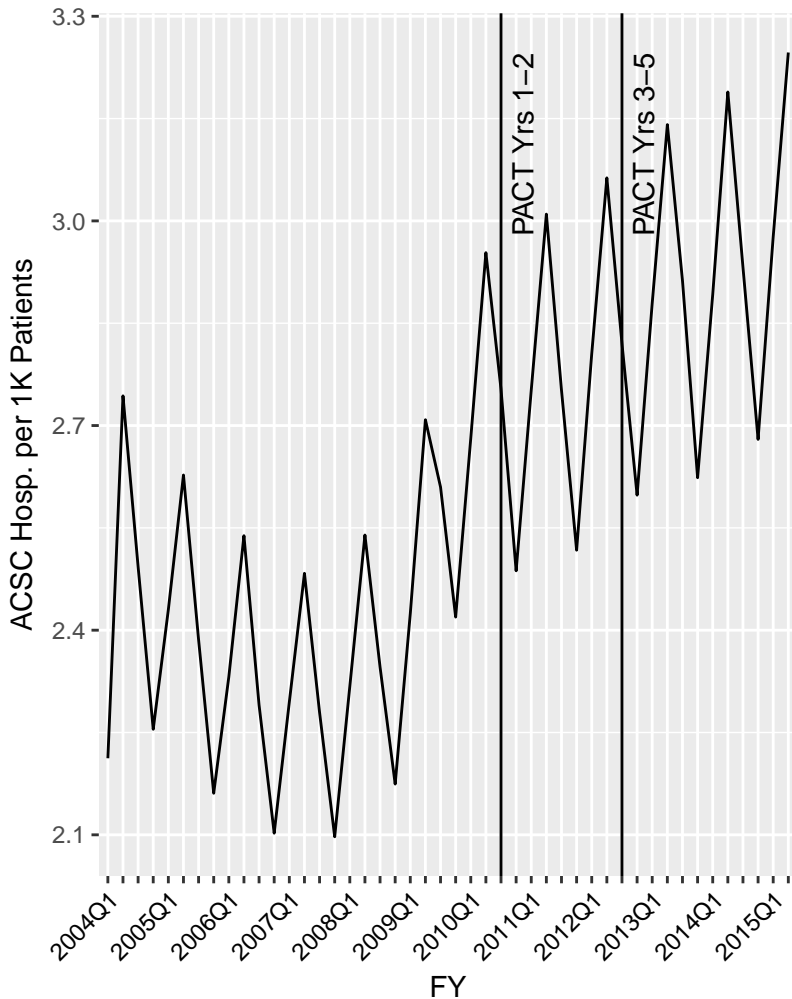

Over 65, Anxiety Dx, No PACT

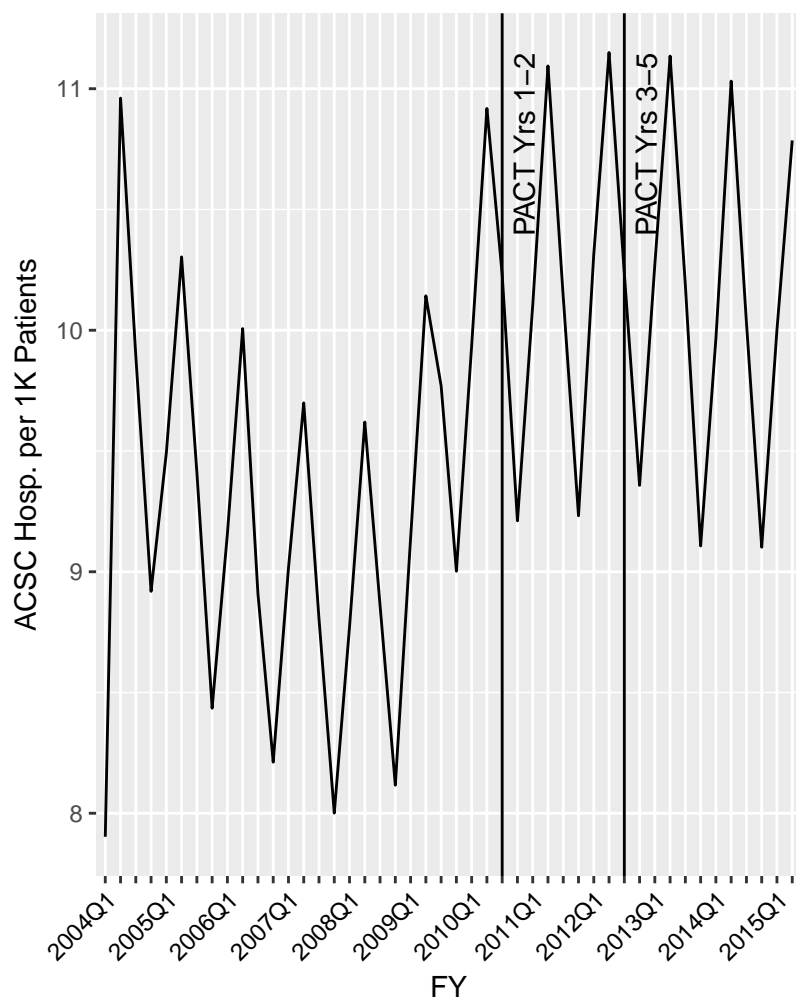

Over 65, No Anxiety Dx, With PACT

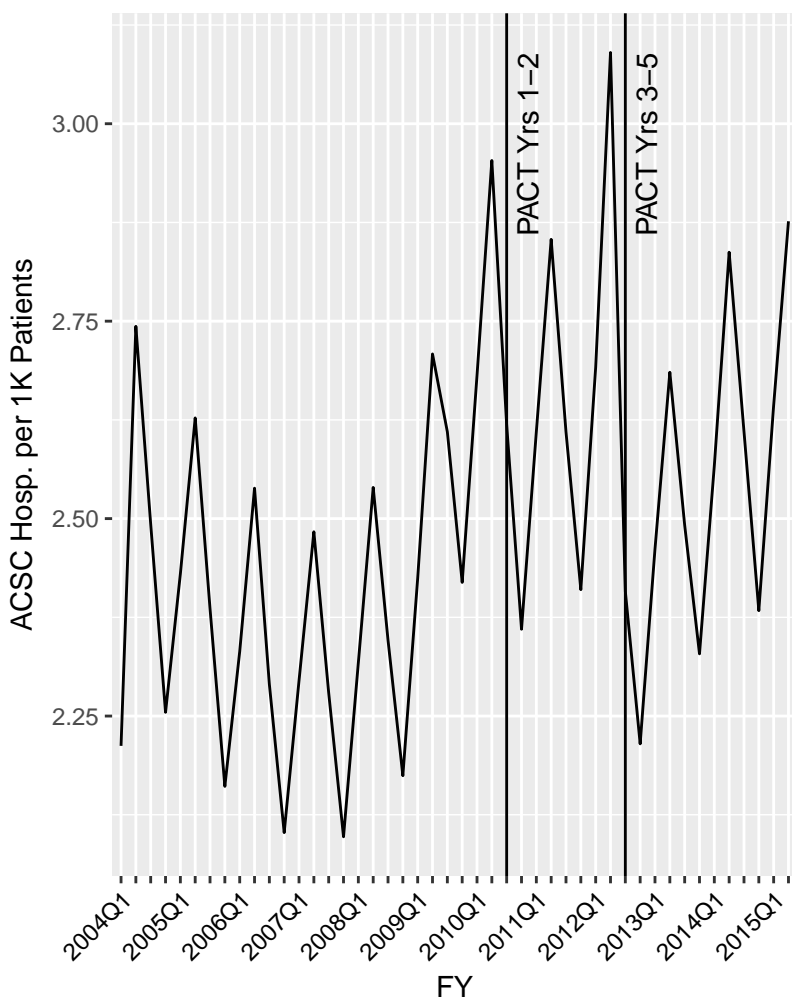

Over 65, Anxiety Dx, With PACT

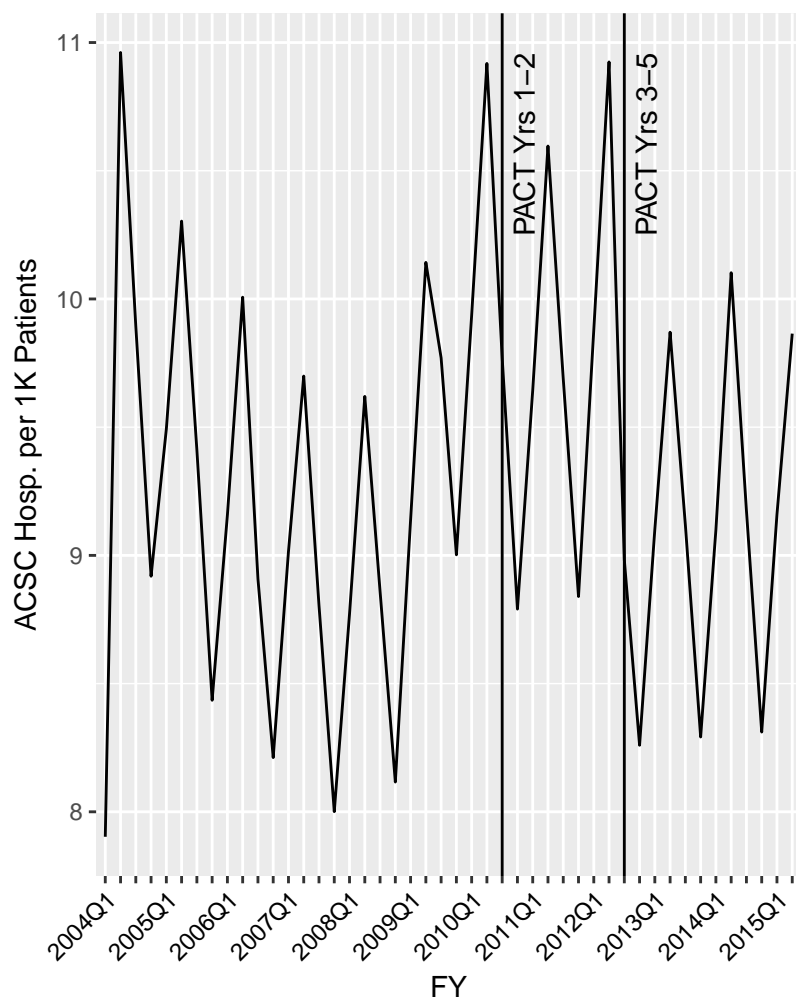

**Under 65, No Depression Dx, No PACT**

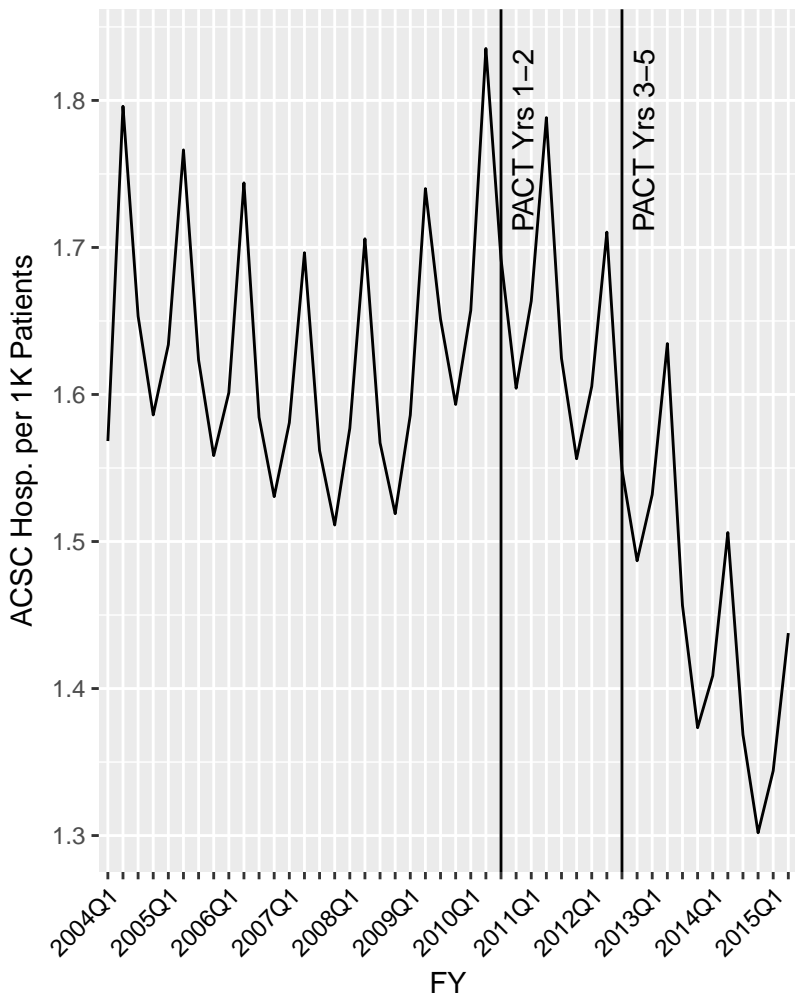

**Under 65, Depression Dx, No PACT**

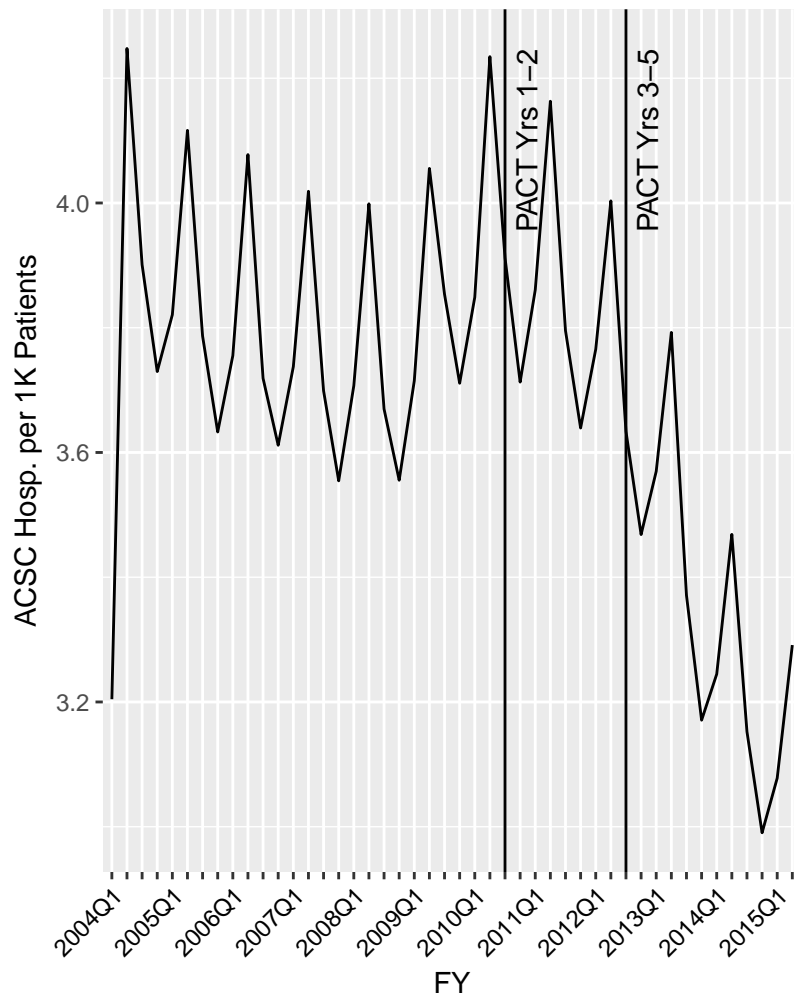

**Under 65, No Depression Dx, With PACT**

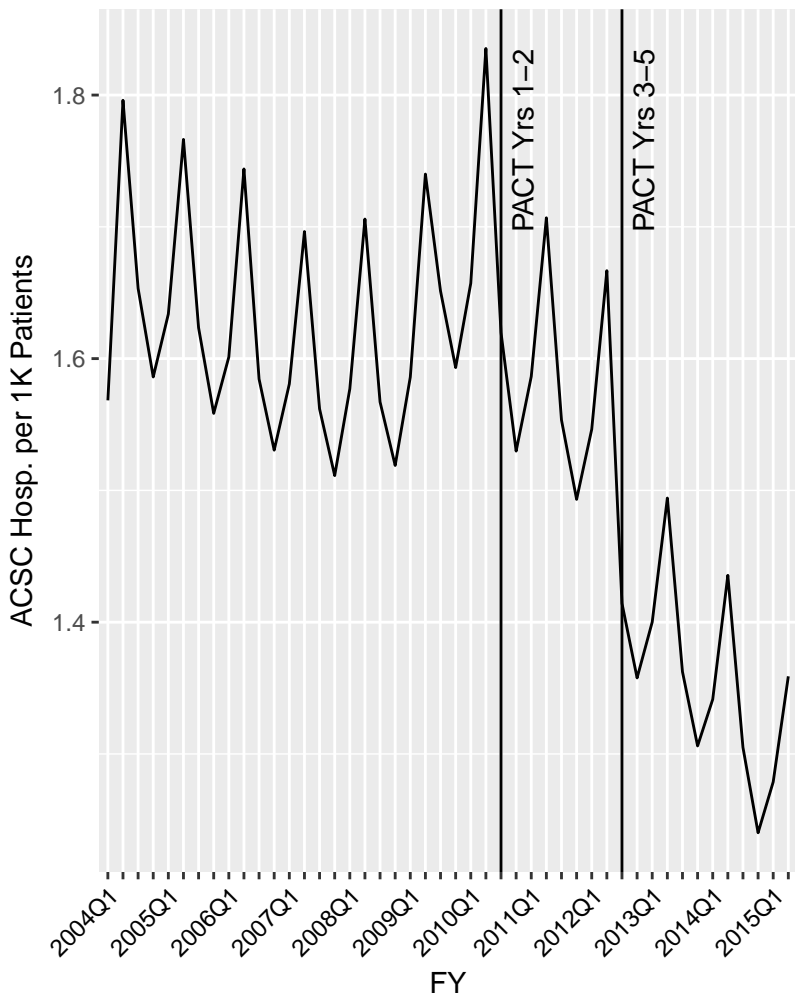

**Under 65, Depression Dx, With PACT**

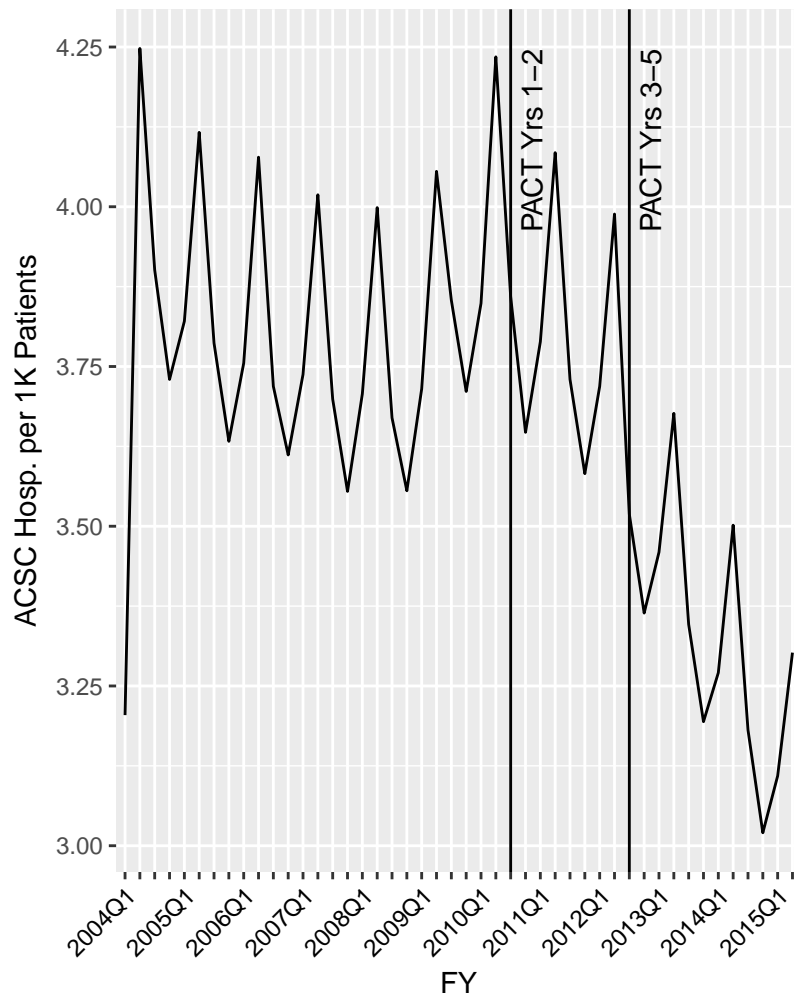

**Over 65, No Depression Dx, No PACT**

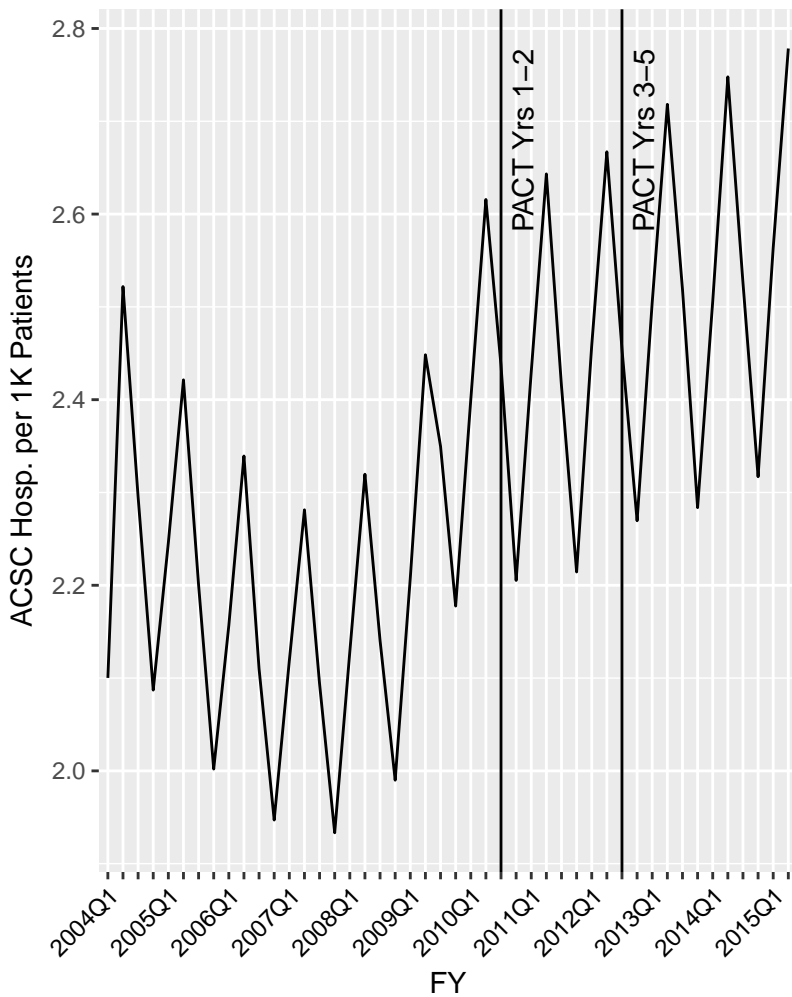

**Over 65, Depression Dx, No PACT**

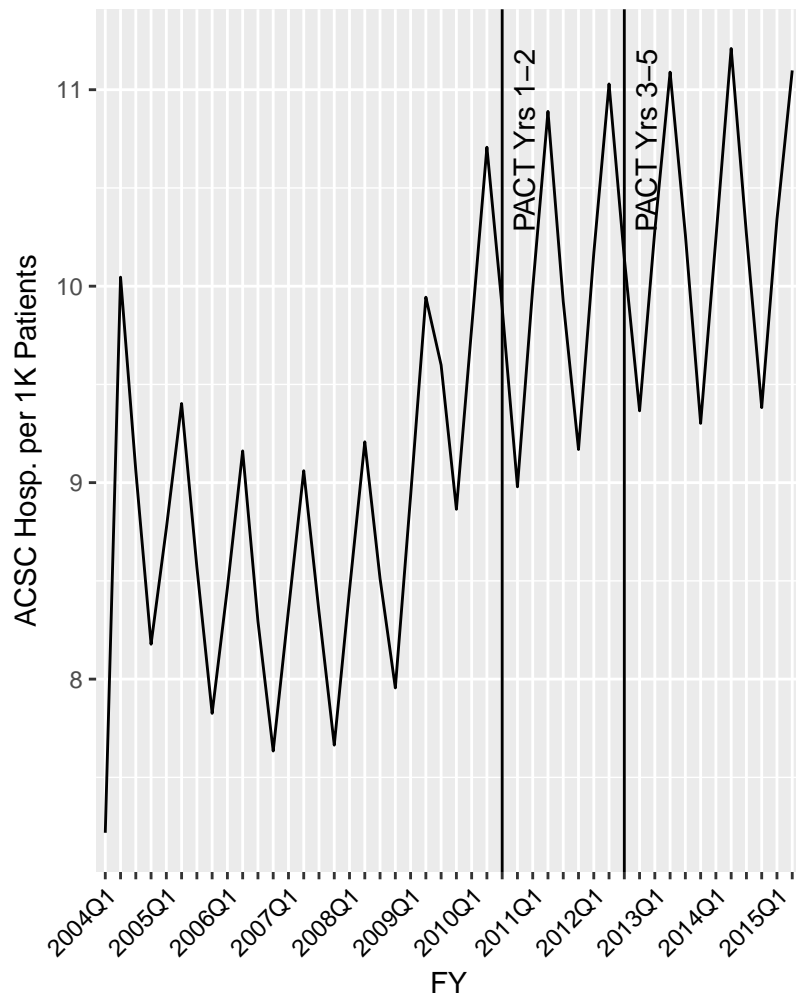

**Over 65, No Depression Dx, With PACT**

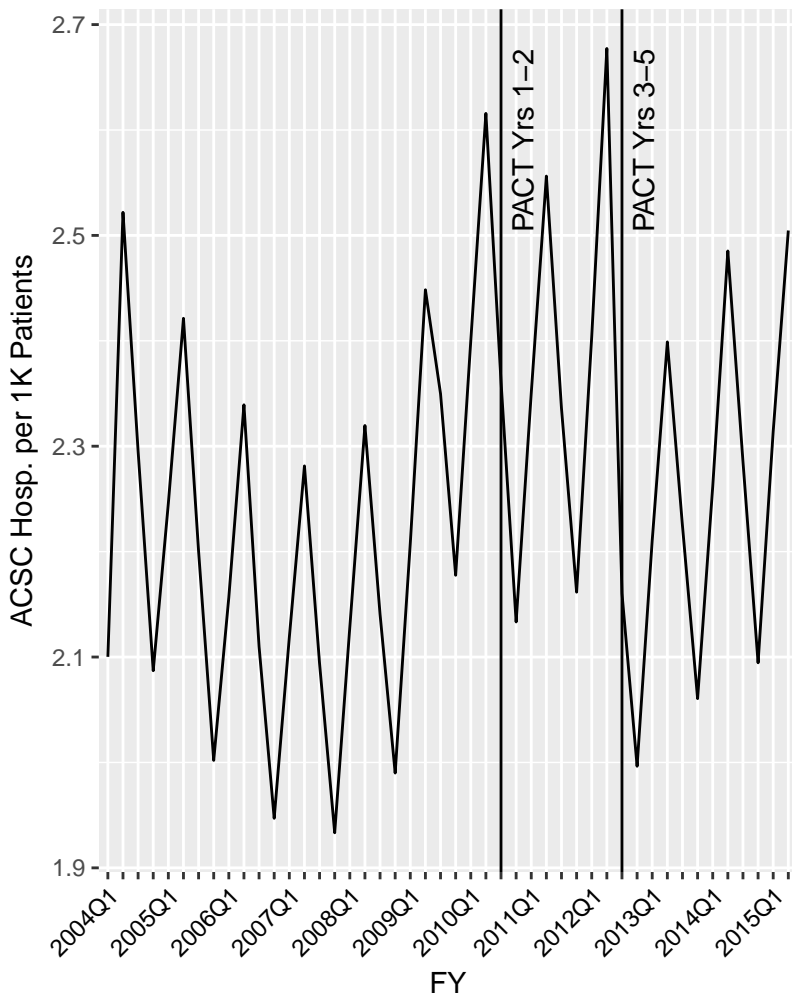

**Over 65, Depression Dx, With PACT**

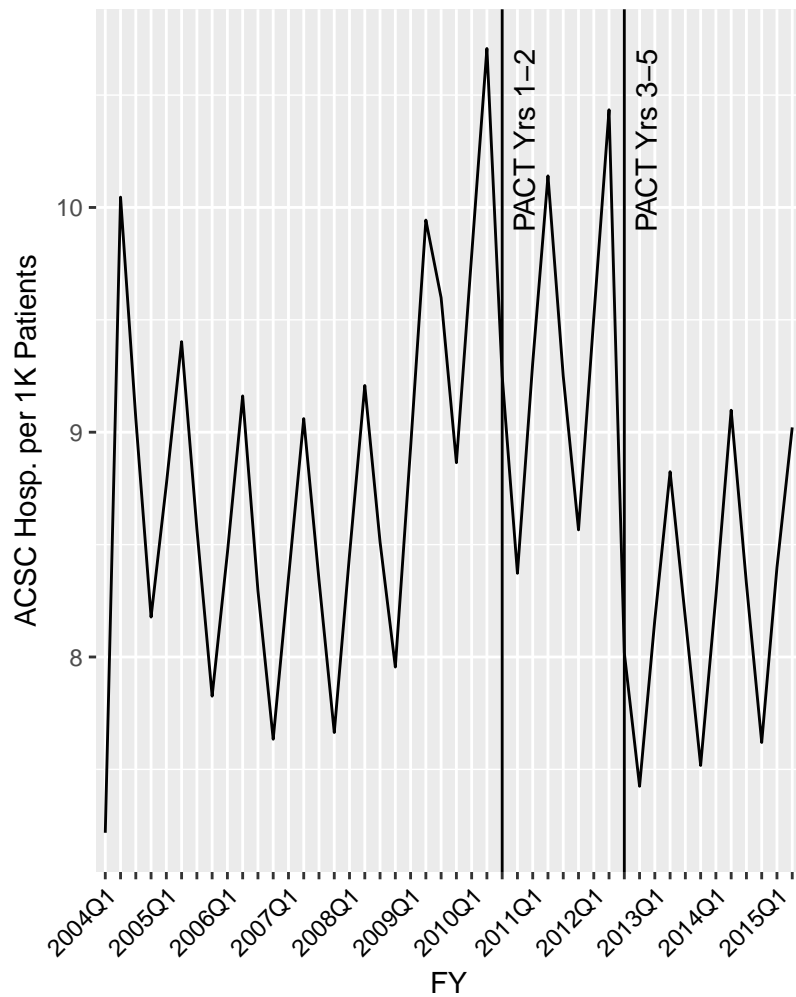

**Under 65, No PTSD Dx, No PACT**

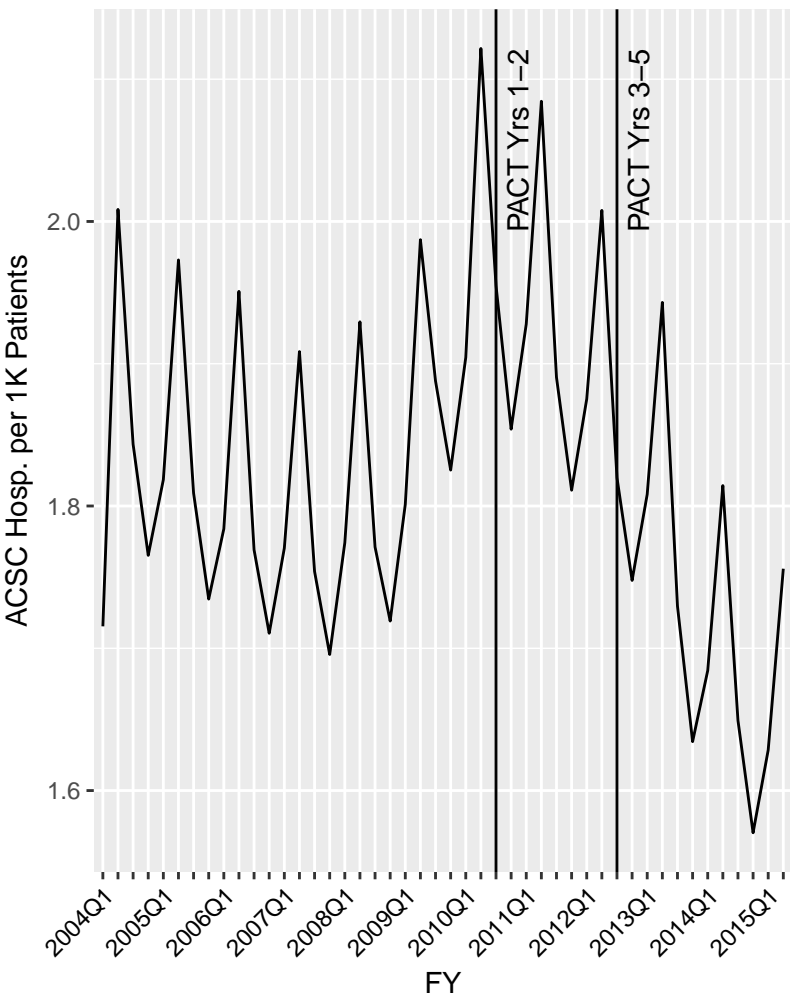

**Under 65, PTSD Dx, No PACT**

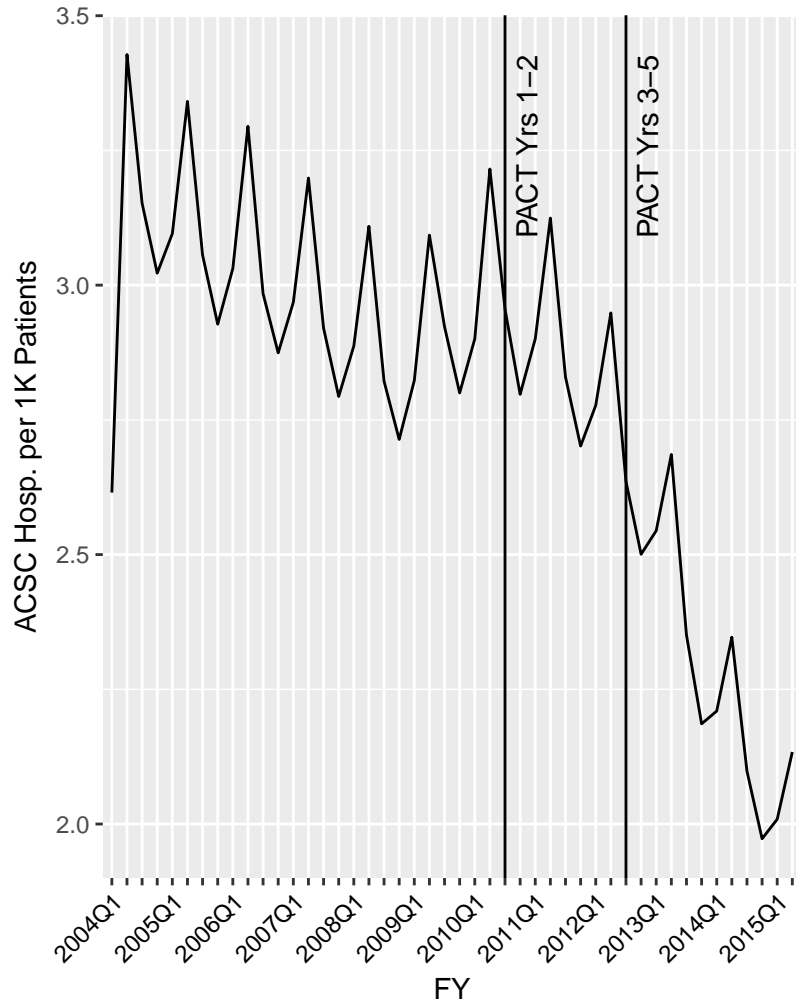

**Under 65, No PTSD Dx, With PACT**

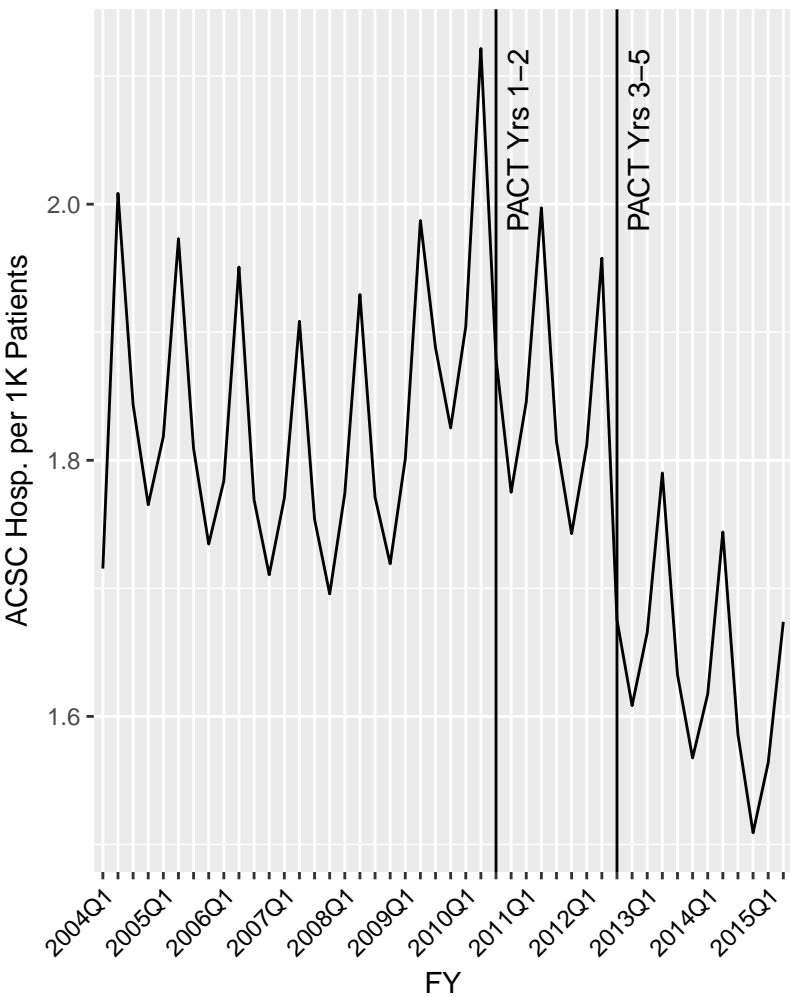

**Under 65, PTSD Dx, With PACT**

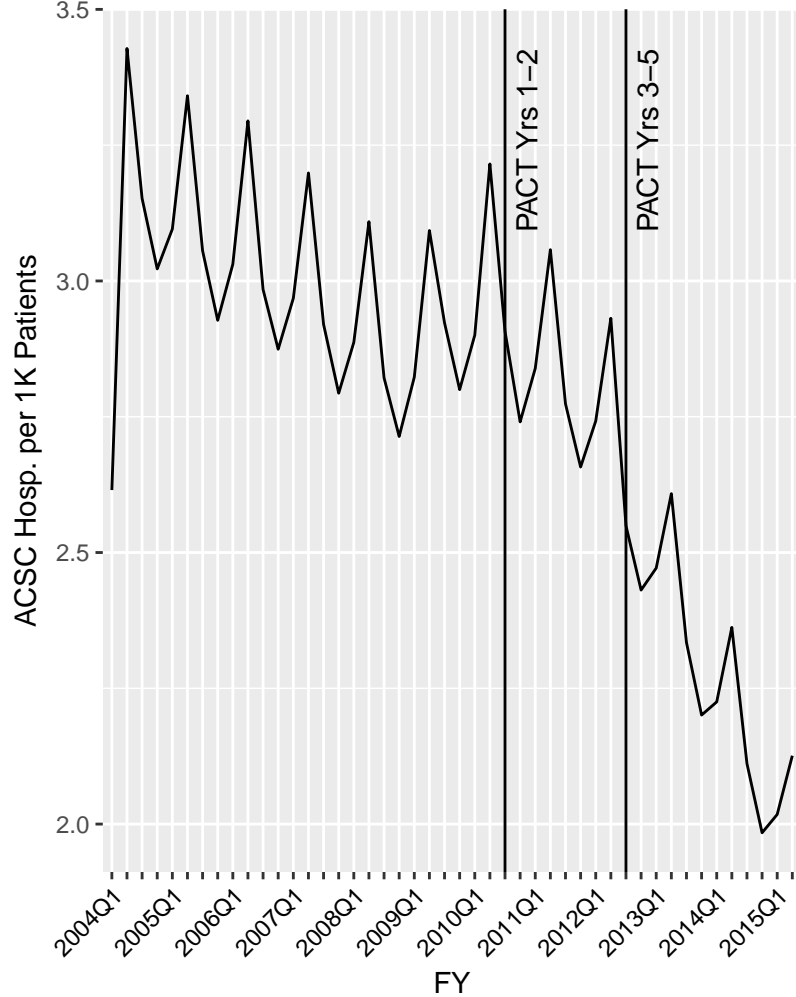



**Over 65, No PTSD Dx, No PACT**

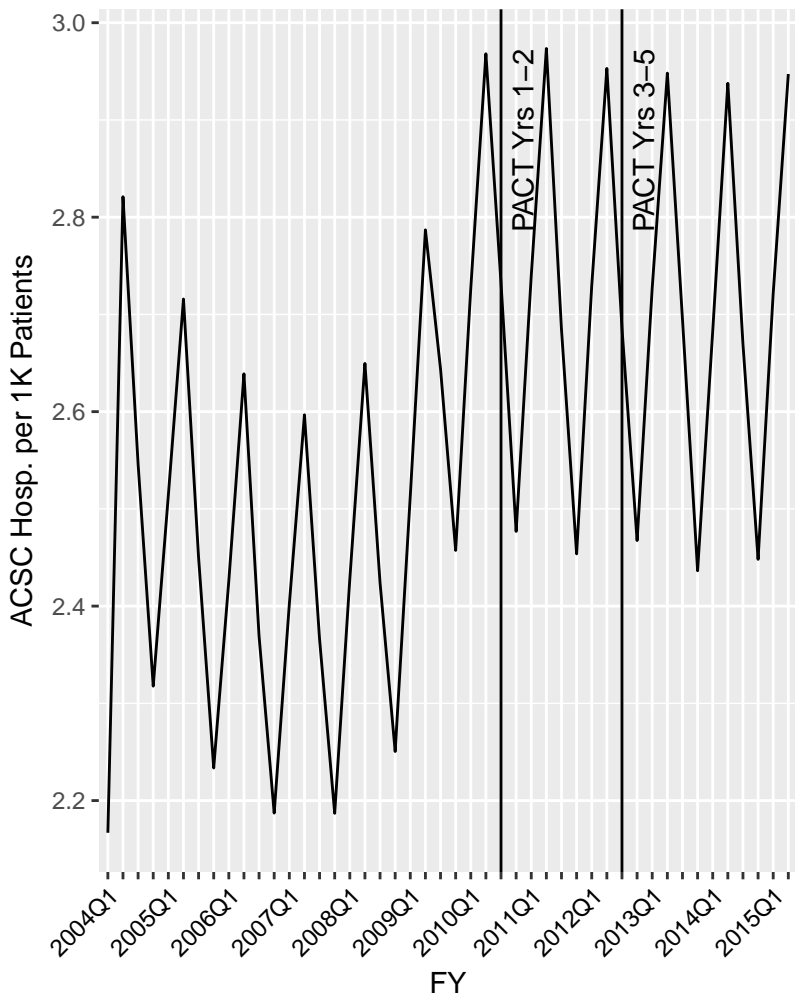

**Over 65, PTSD Dx, No PACT**

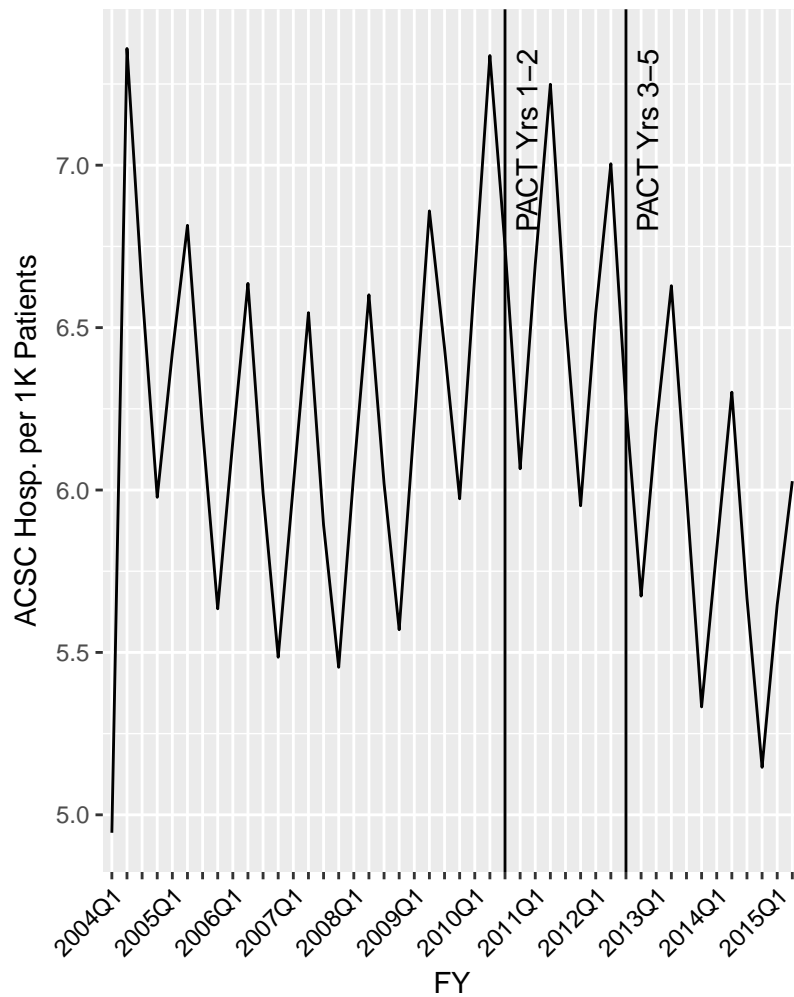

**Over 65, No PTSD Dx, With PACT**

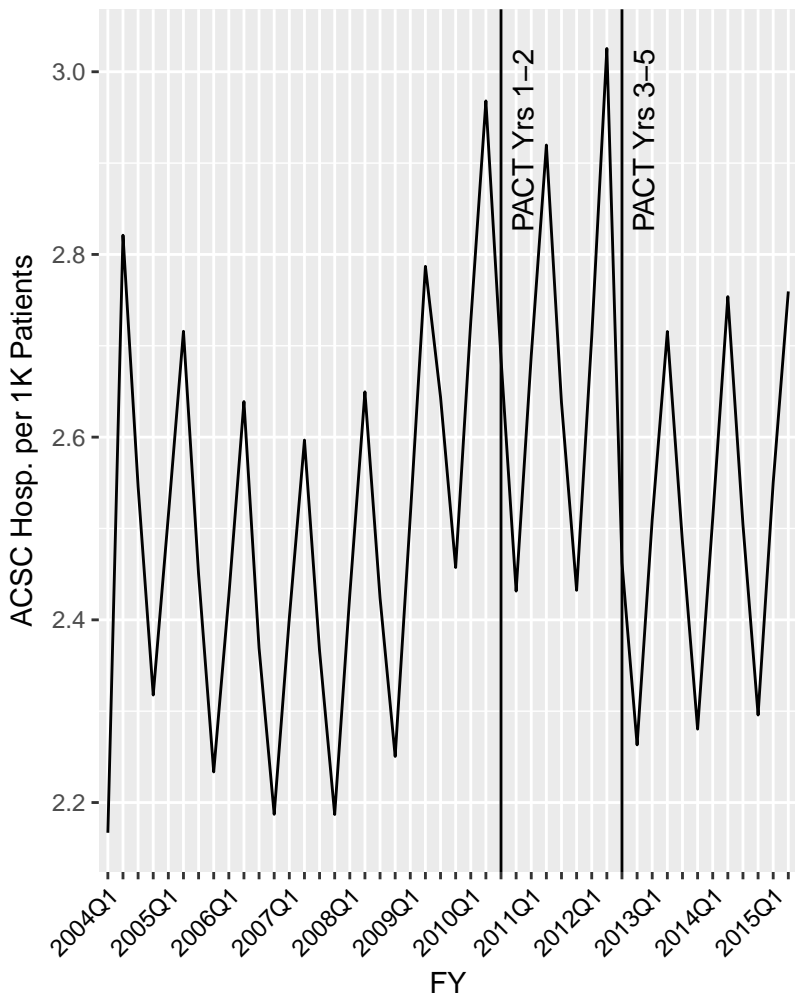

**Over 65, PTSD Dx, With PACT**

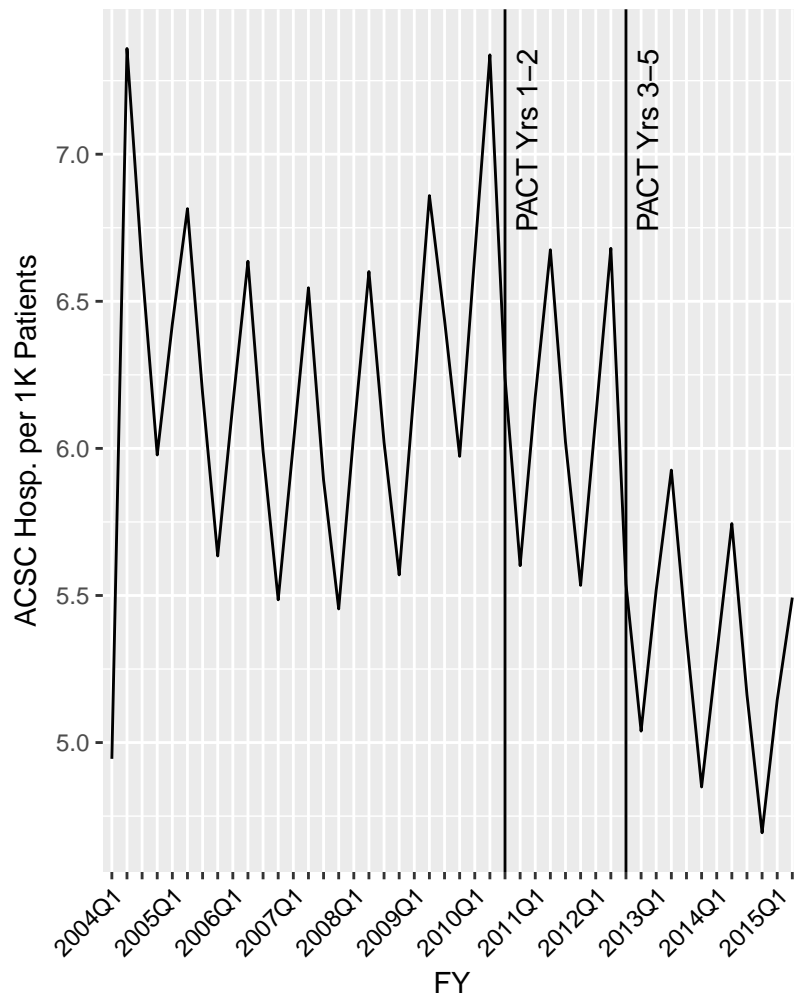

**Under 65, No Serious Mental Illness Dx, No PACT**

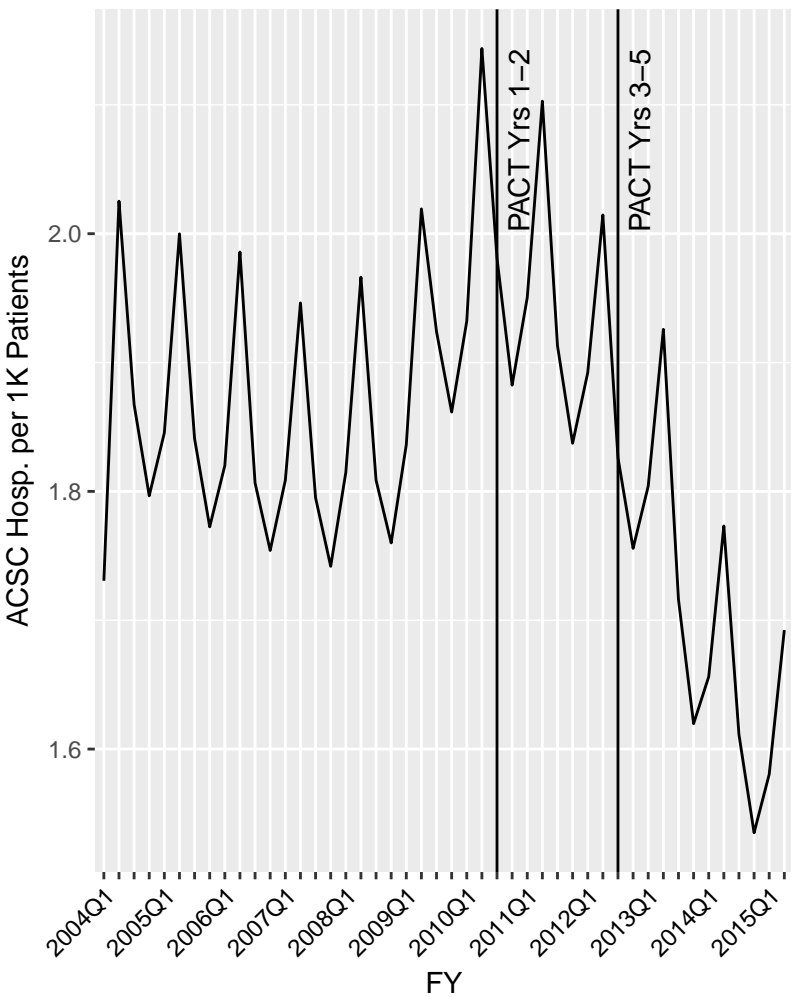

**Under 65, Serious Mental Illness Dx, No PACT**

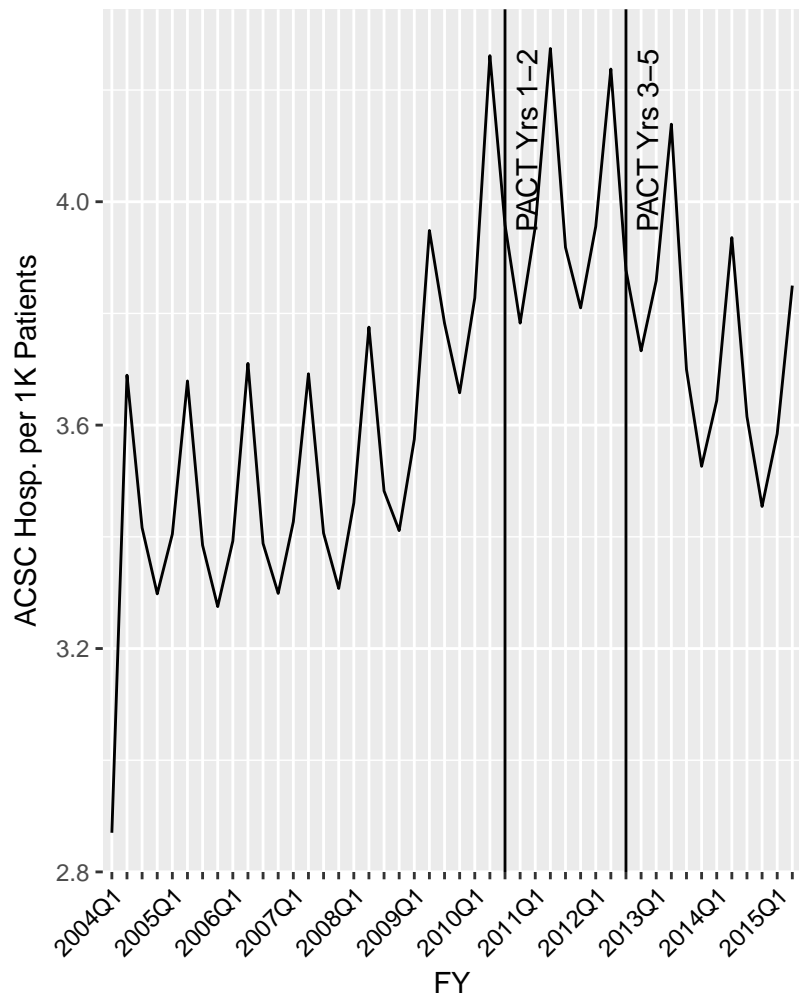

**Under 65, No Serious Mental Illness Dx, With PACT**

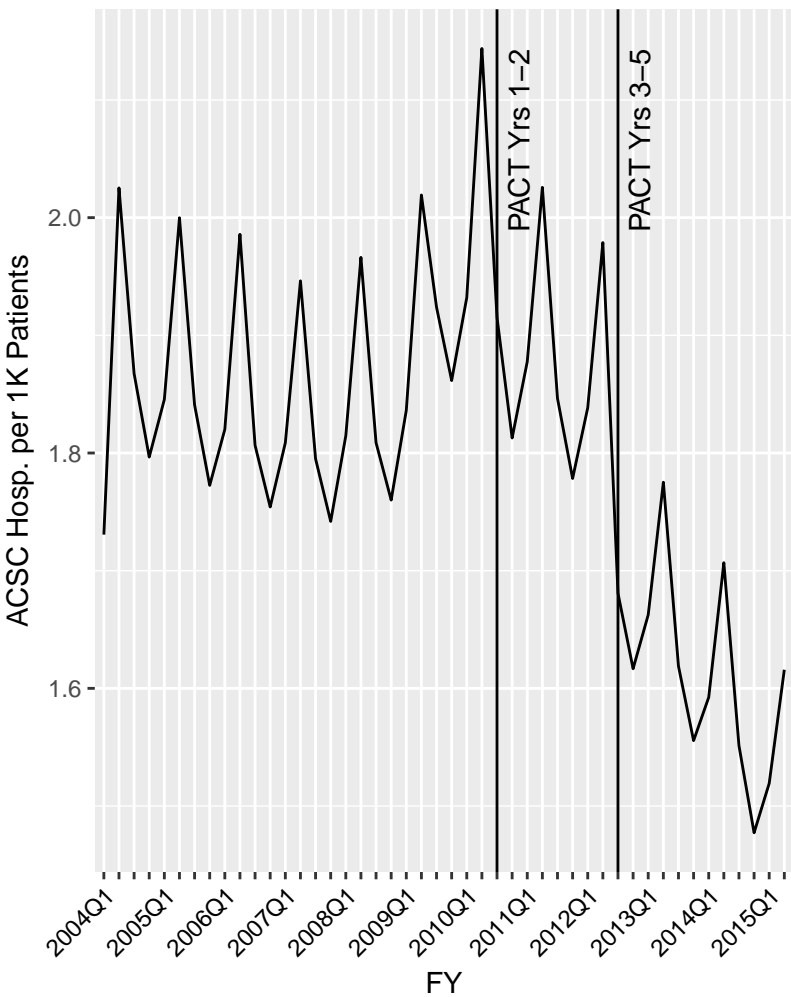

**Under 65, Serious Mental Illness Dx, With PACT**

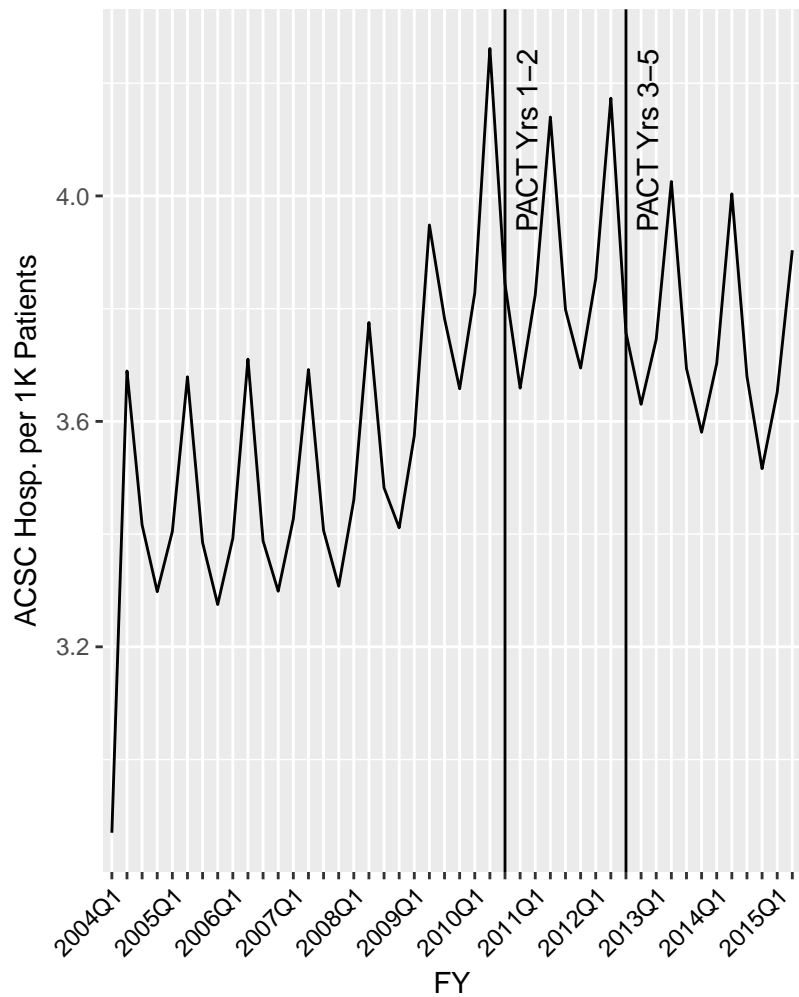

**Over 65, No Serious Mental Illness Dx, No PACT**

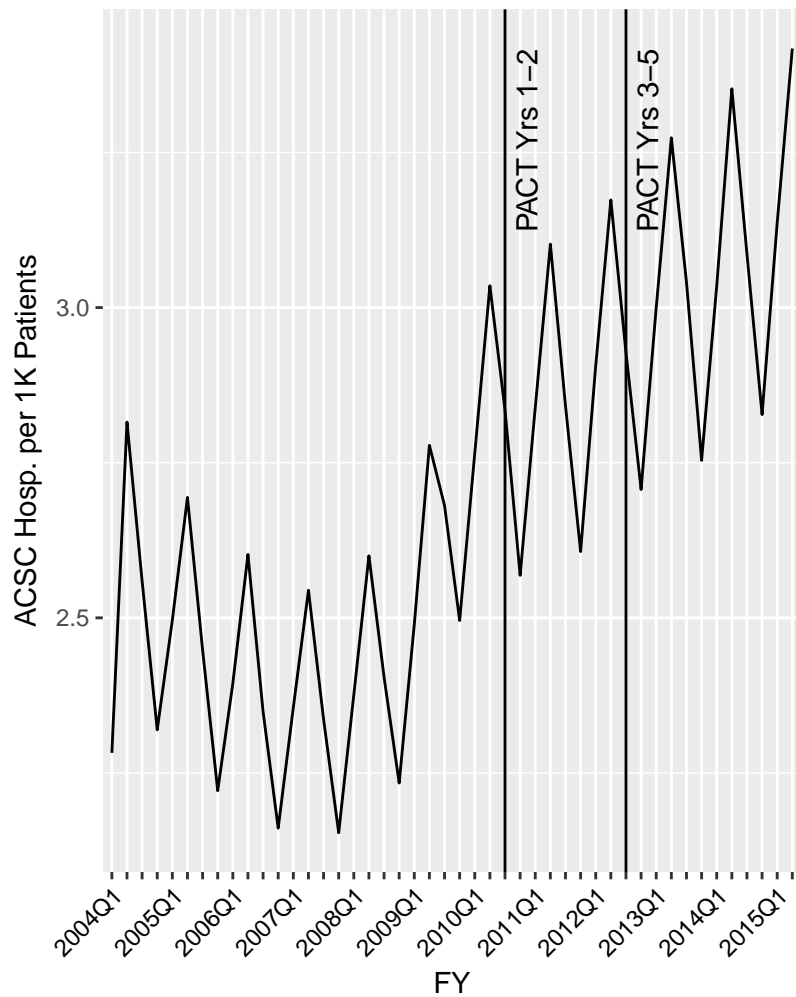

**Over 65, Serious Mental Illness Dx, No PACT**

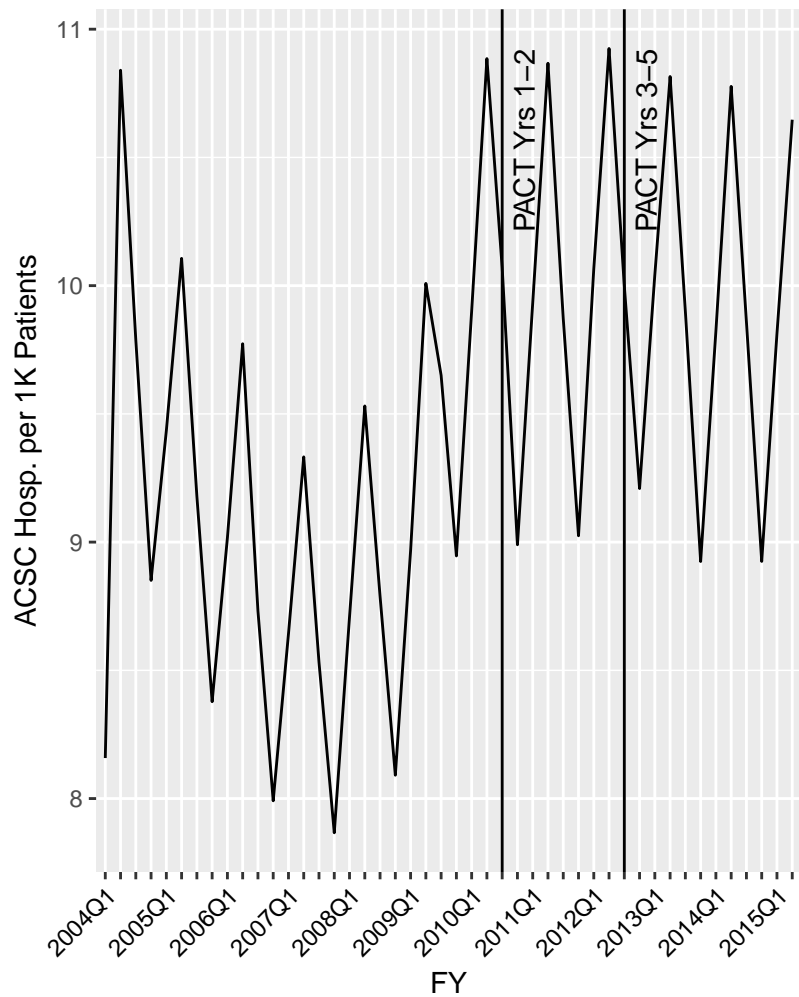

**Over 65, No Serious Mental Illness Dx, With PACT**

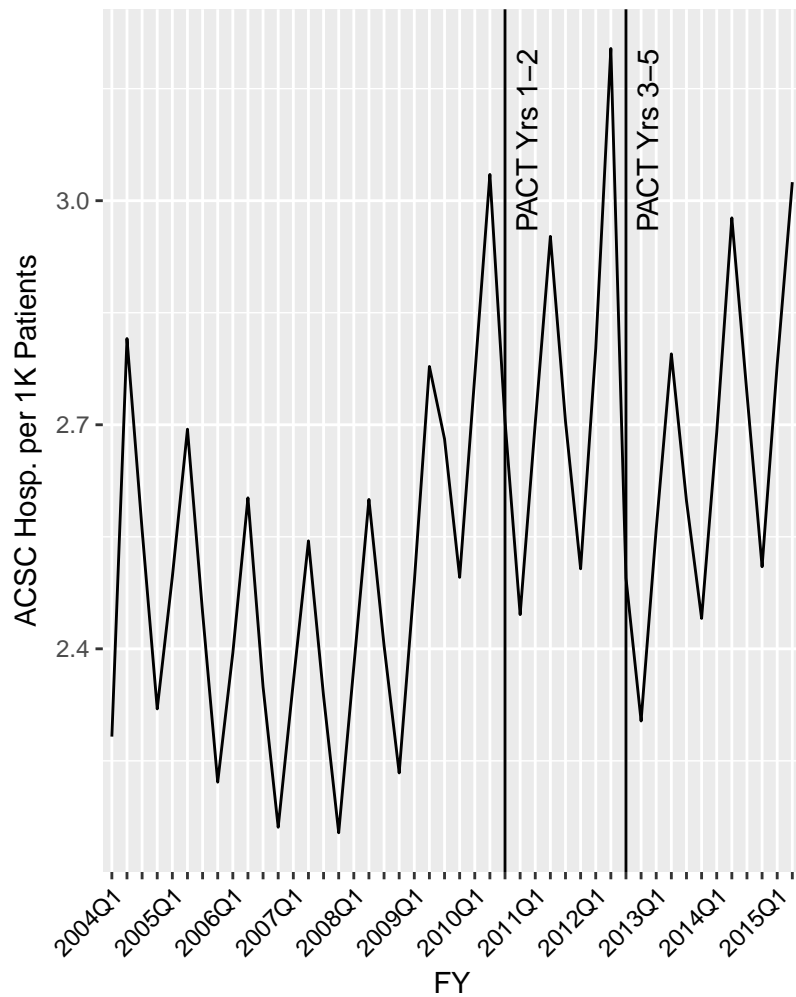

**Over 65, Serious Mental Illness Dx, With PACT**

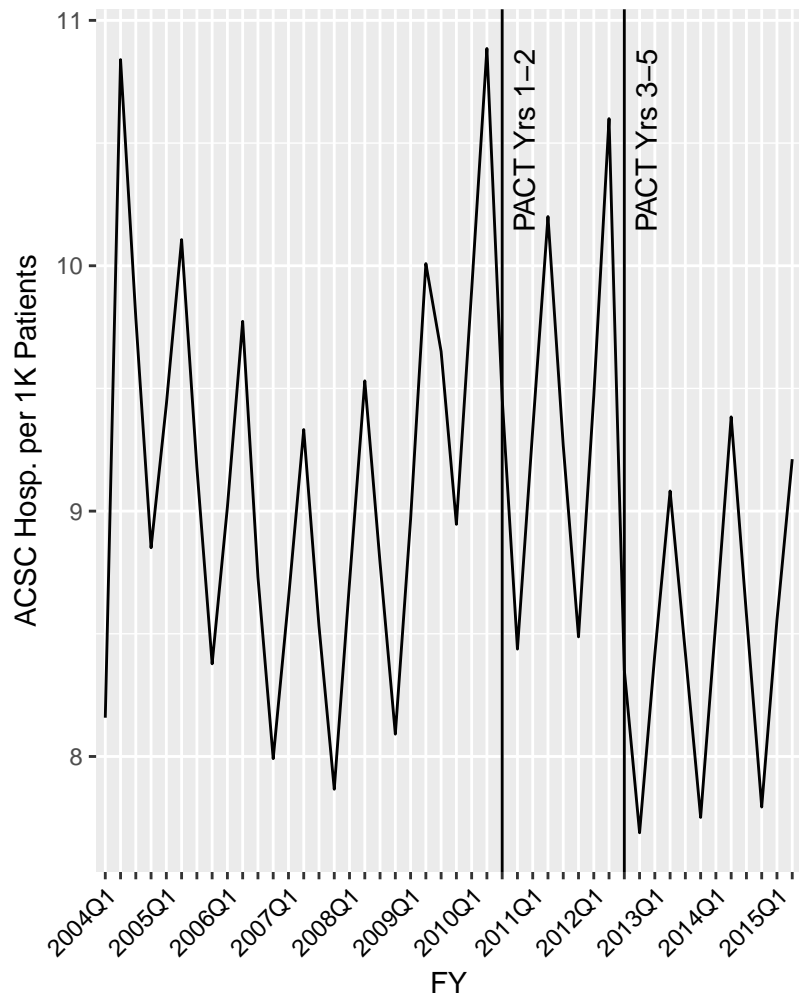

**Under 65, No Substance Use Dx, No PACT**

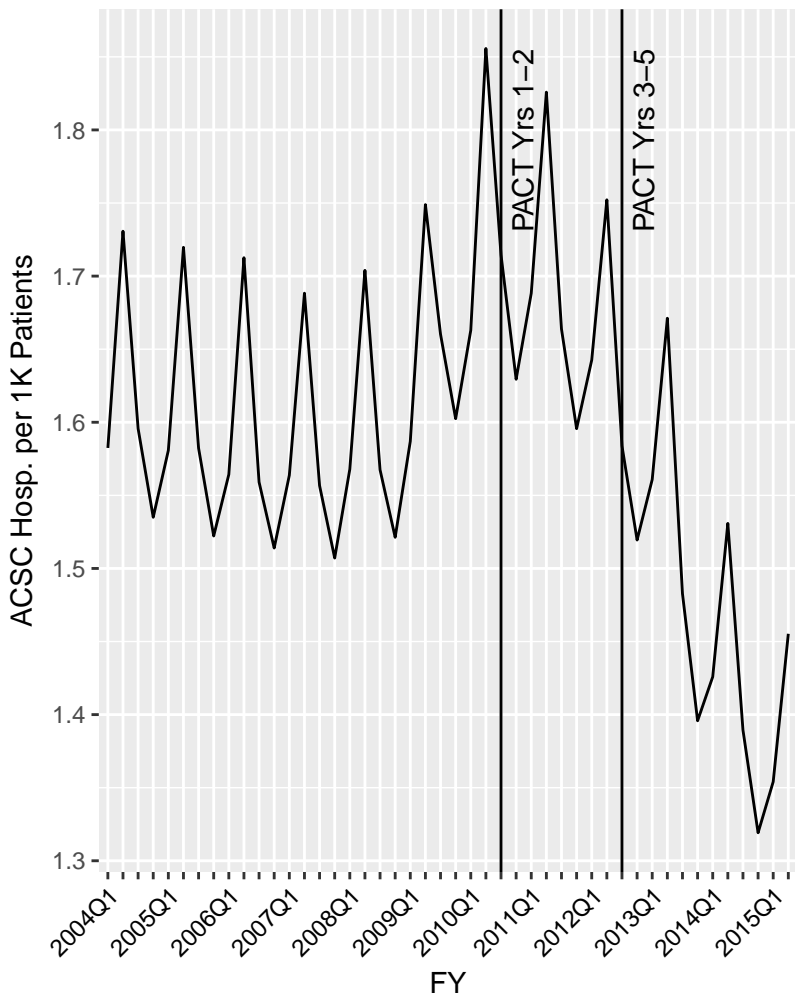

**Under 65, Substance Use Dx, No PACT**

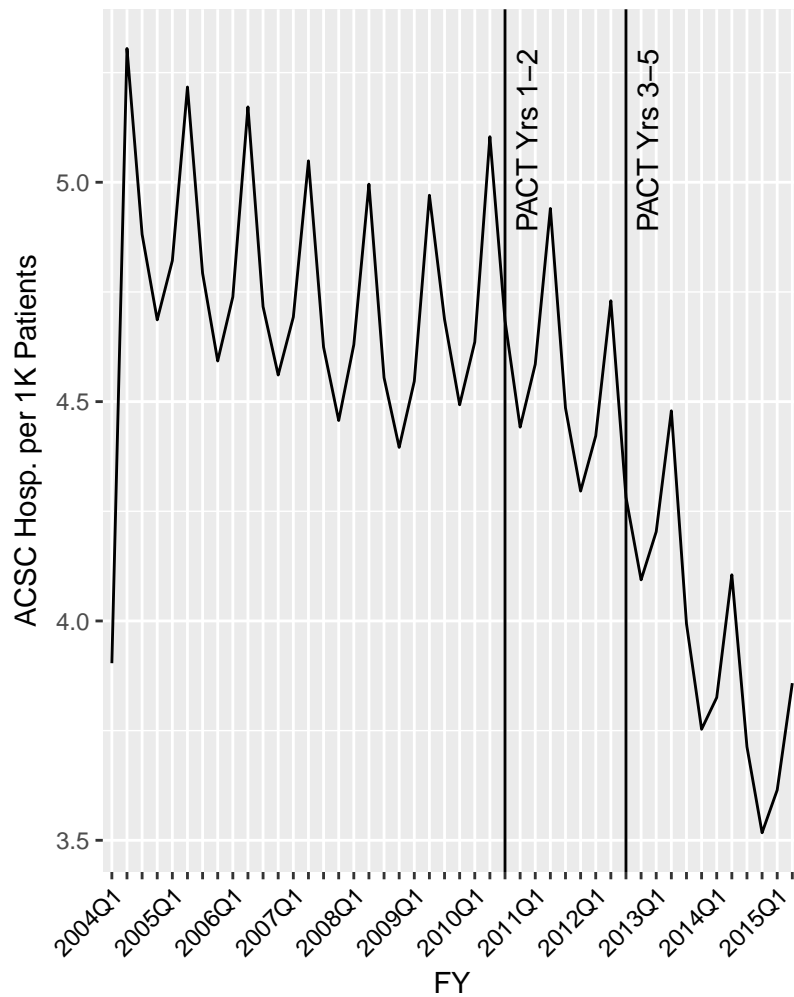

**Under 65, No Substance Use Dx, With PACT**

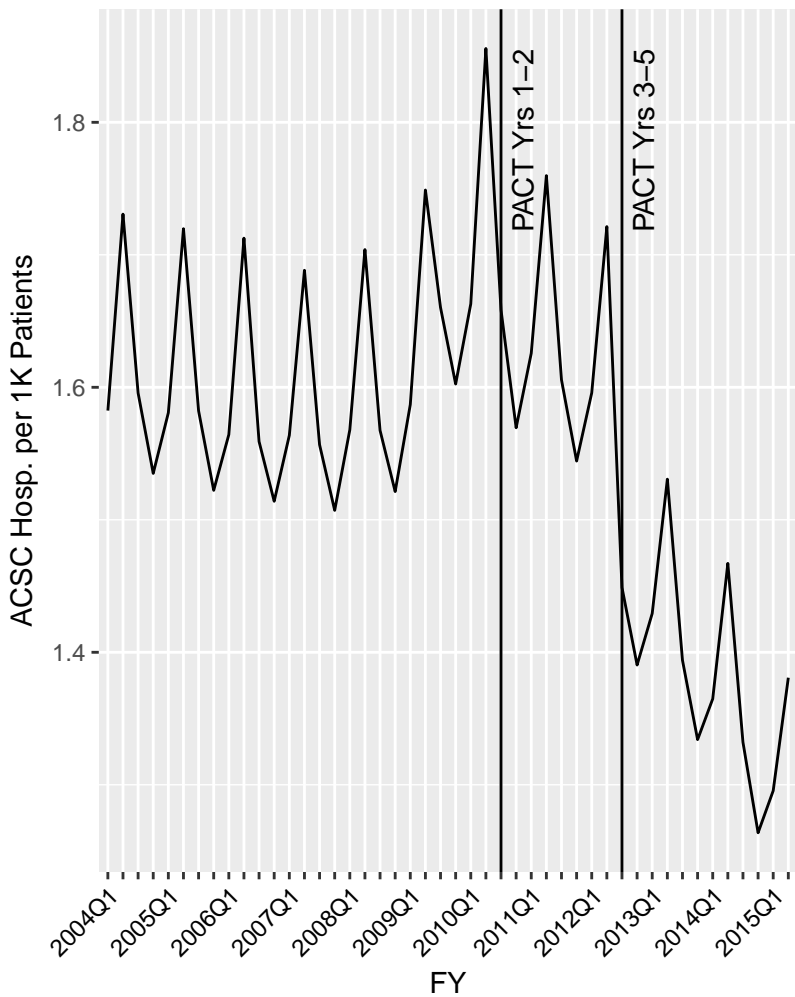

**Under 65, Substance Use Dx, With PACT**

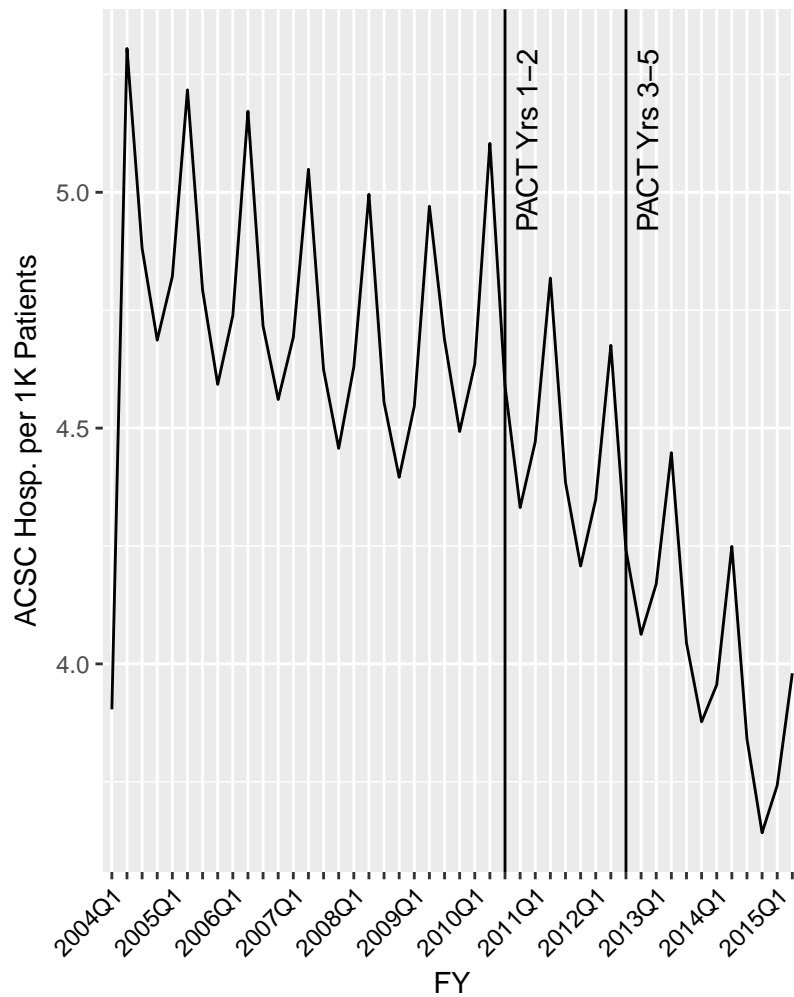

**Over 65, No Substance Use Dx, No PACT**

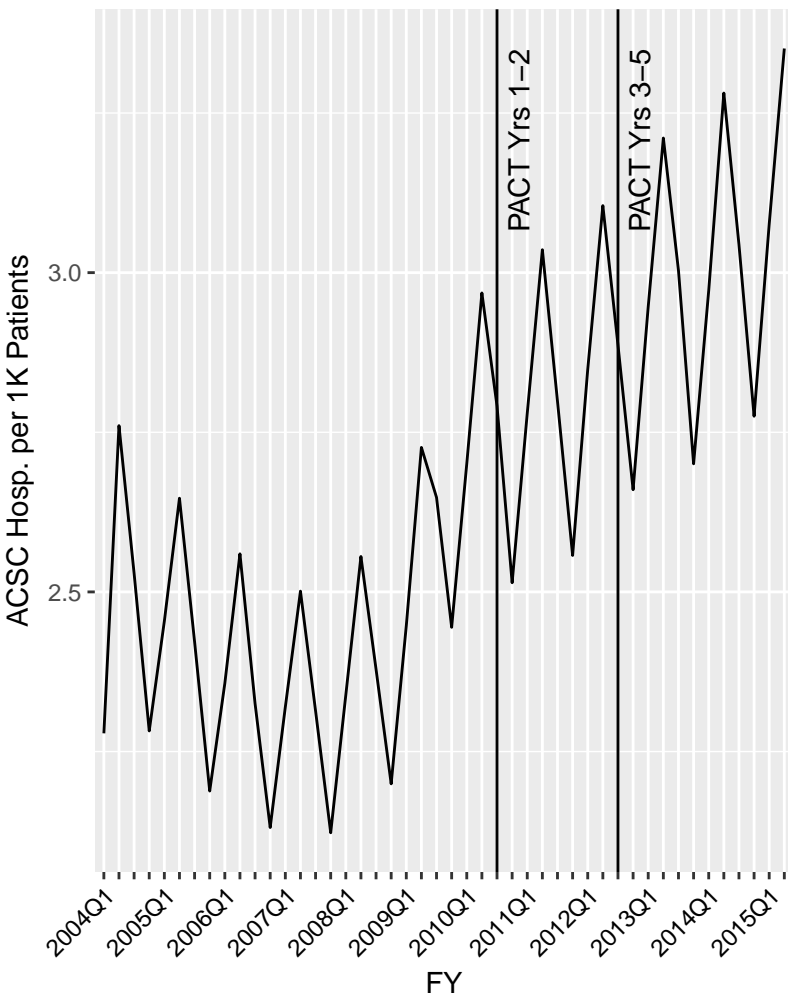

**Over 65, Substance Use Dx, No PACT**

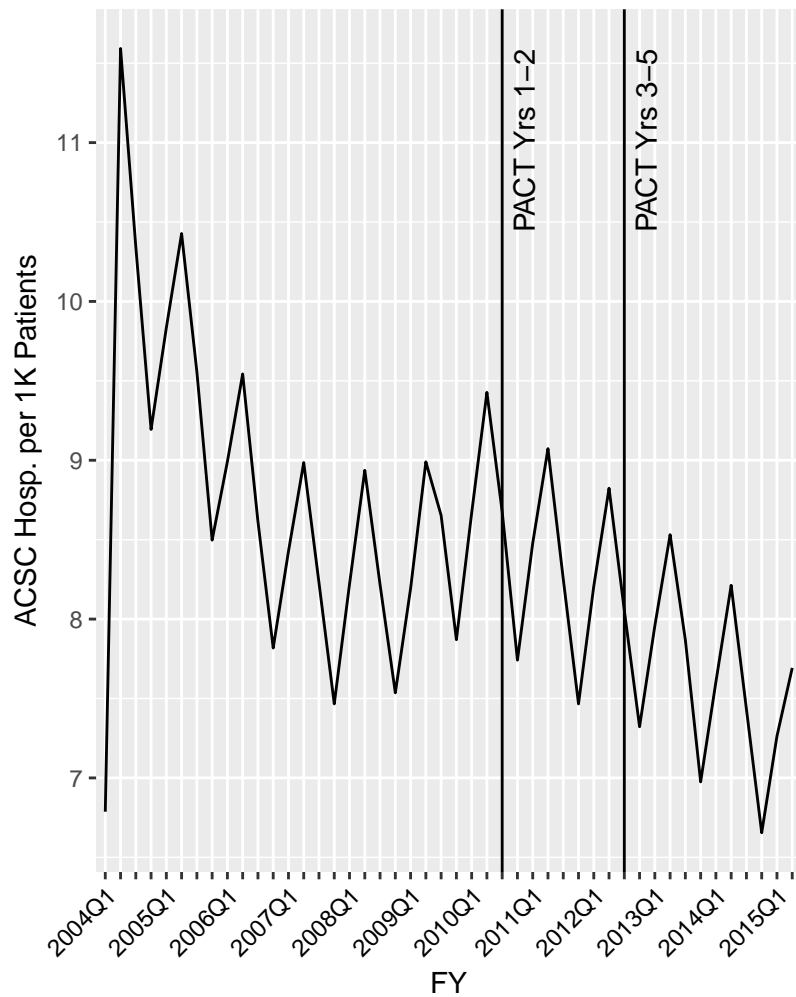

**Over 65, No Substance Use Dx, With PACT**

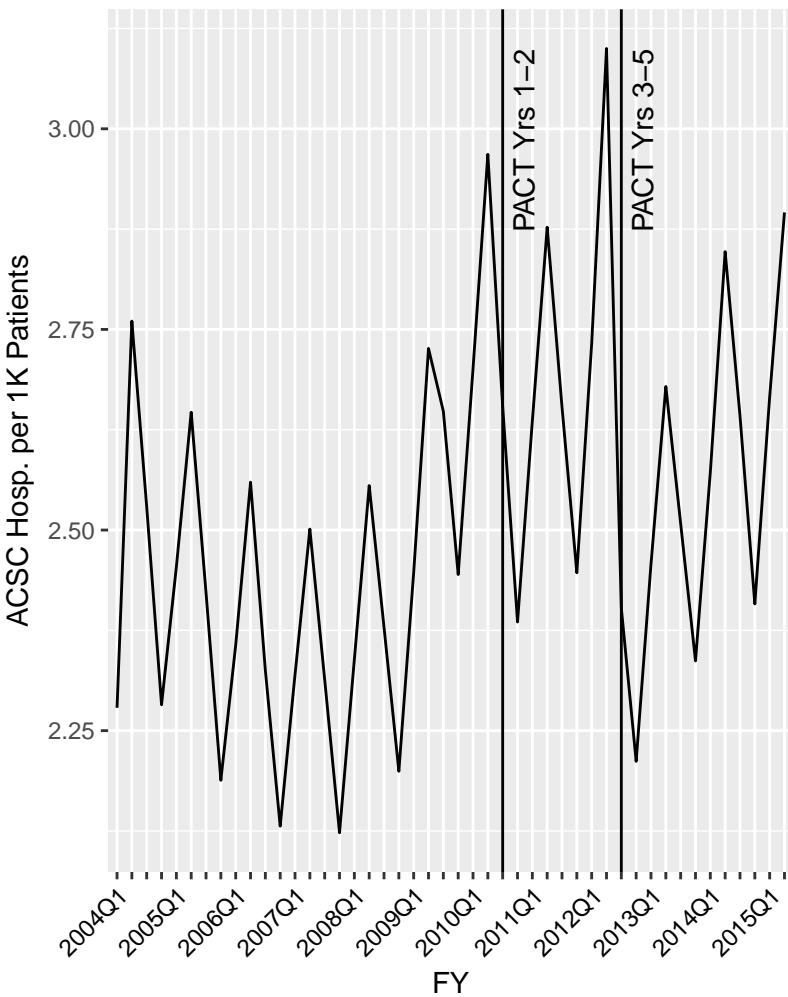

**Over 65, Substance Use Dx, With PACT**

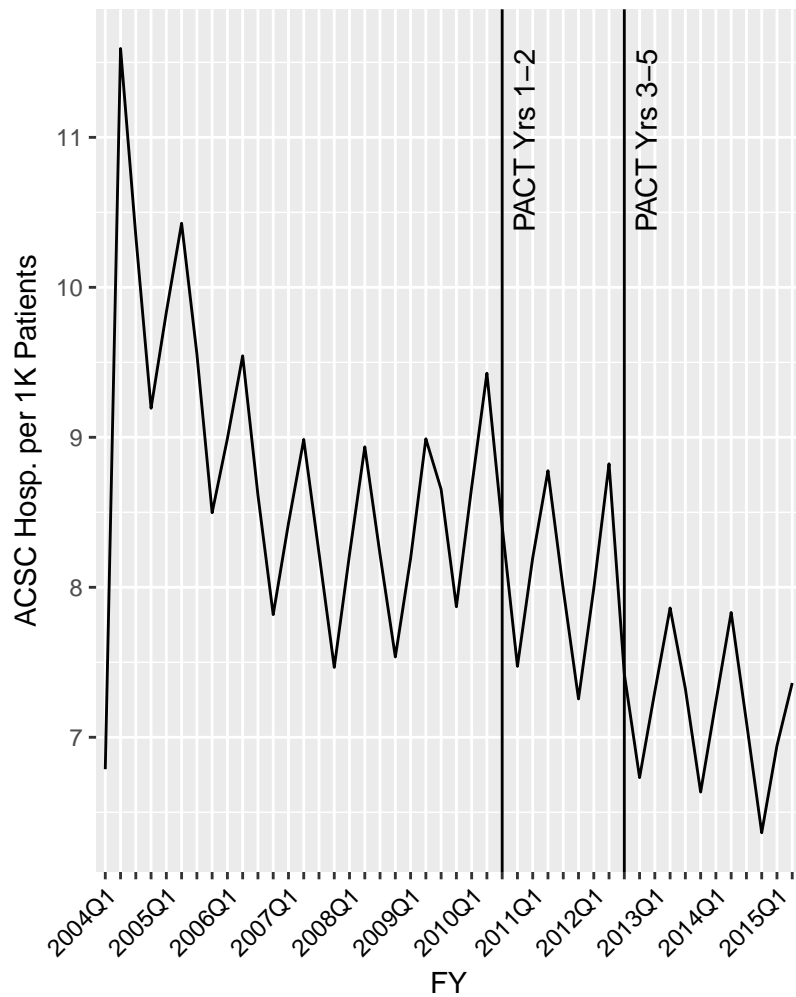

Supplement: appi.ps.201700316.ds001.pdf [file appi.ps.201700316.ds001.pdf]
